# Supplementary material for: Evolution of Chaperonin Gene Duplication in Stigonematalean Cyanobacteria (Subsection V)
Source: PubMed Central journal article supplement (PMC5381637; doi:10.1093/gbe/evw287), 2017-01-12
Supplement: evw287_Supp.pdf [file evw287_Supp.pdf]

## **Evolution of Chaperonin Gene Duplication in Stigonematalean Cyanobacteria (Subsection V)**

Julia Weissenbach<sup>1</sup>, Judith Ilhan<sup>1</sup>, David Bogumil<sup>2</sup>, Nils Hülter<sup>1</sup>, Karina Stucken<sup>1</sup>, Tal Dagan<sup>1</sup>

<sup>1</sup>Institute of General Microbiology, Christian-Albrechts University of Kiel, Am Botanischen Garten 11, 24118 Kiel, Germany. <sup>2</sup>Present address: The Department of Life Sciences & the National Institute for Biotechnology in the Negev, Ben-Gurion University of the Negev, Beer-Sheva 84105, Israel.

### **Supplementary Data**

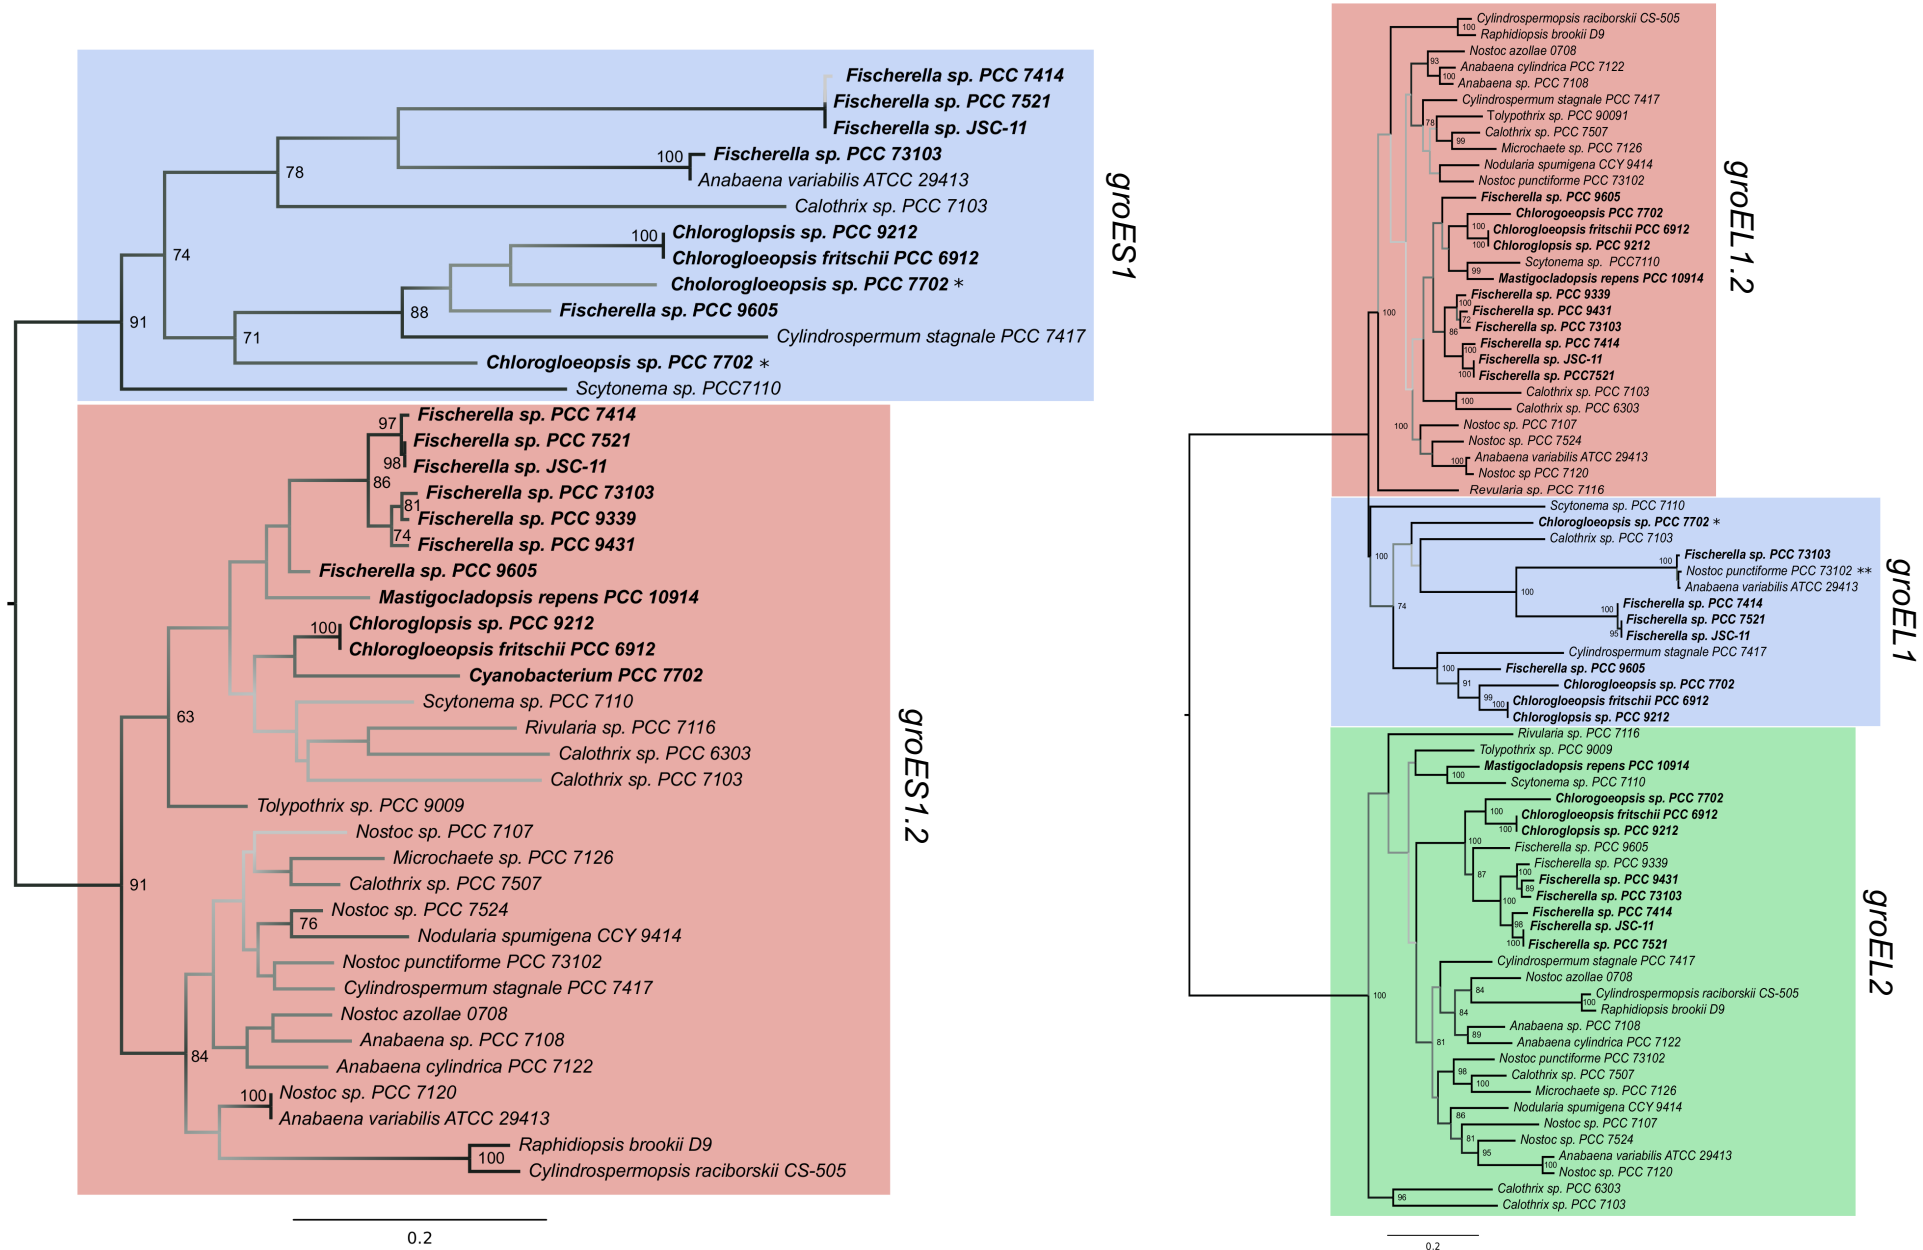

**Figure S1.** Phylogenetic trees of (A) groES and (B) groEL genes in Nostocales and Stigonematales. Branch color corresponds to bootstrap support, ranging between 5 and 100. Only bootstrap support values >70 are presented.

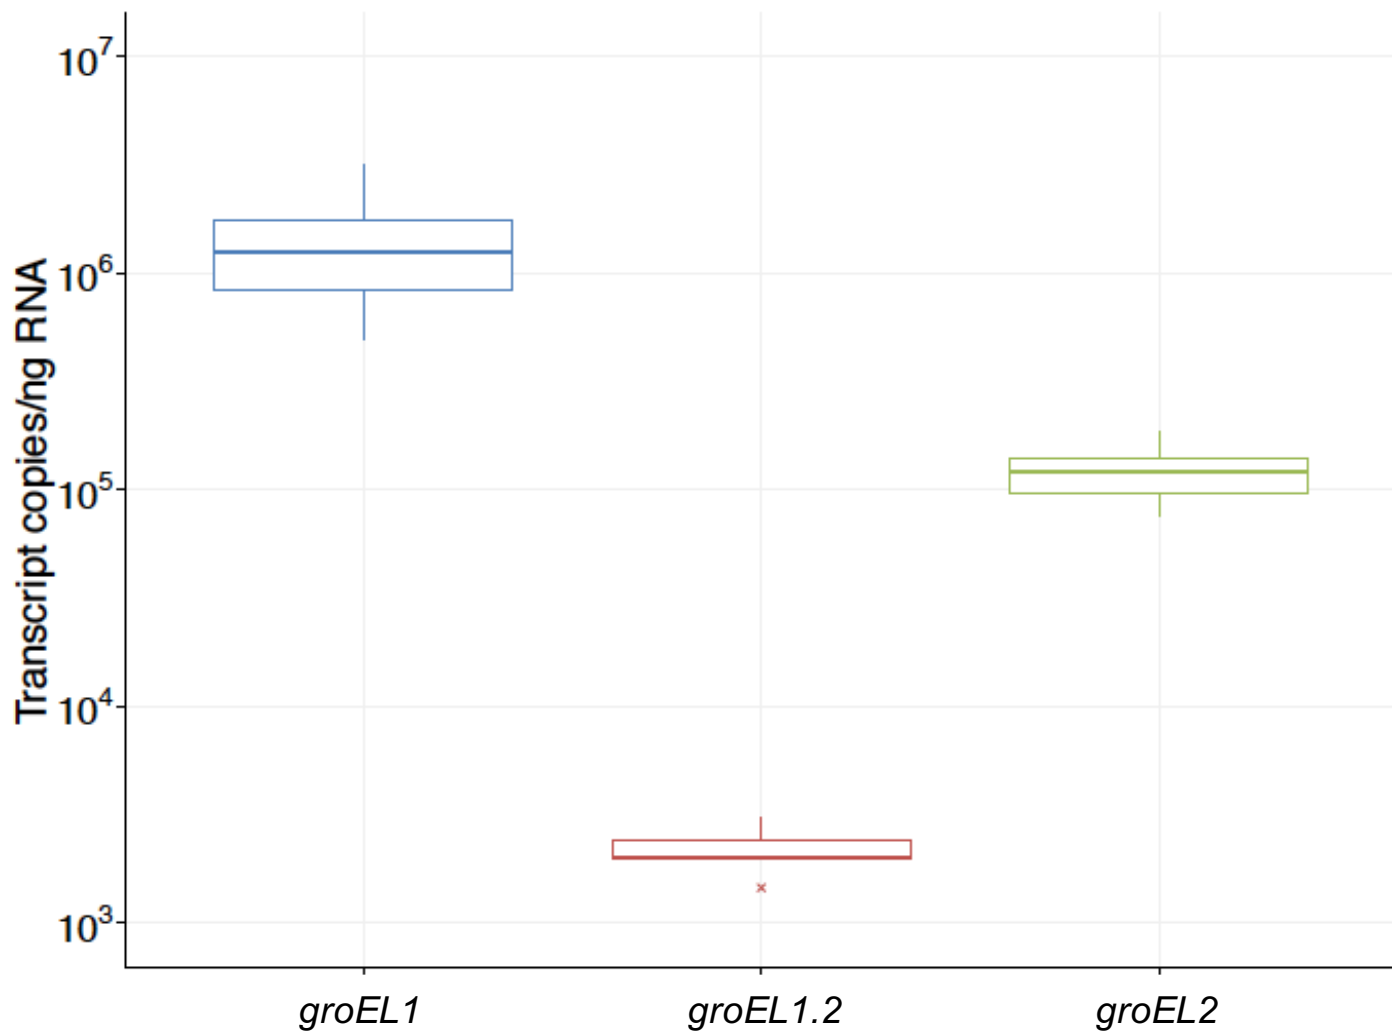

**Figure S2:** Absolute transcript abundance of *groEL* paralogs in *C. fritschii* PCC 6912 under standard cultivation conditions. RNA was extracted from six independent biological replicates grown under standard conditions.

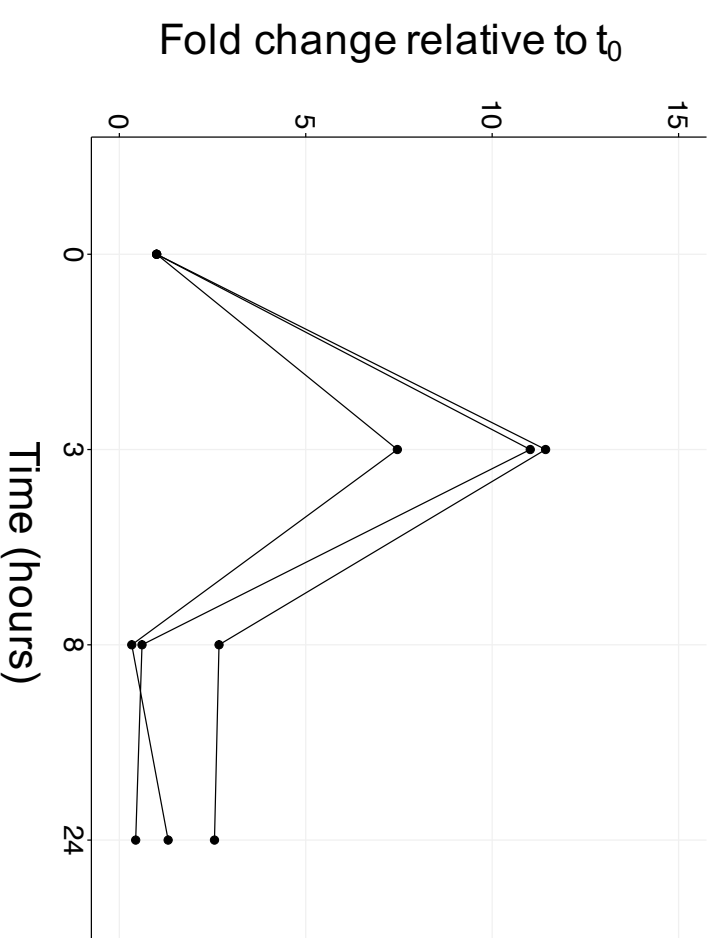

**Figure S3.** Relative transcript levels of *glnA* in *C. fritschii* PCC 6912. Graph shows the transcript abundance for three independent biological replicates from cultures grown under diazotrophic conditions. RNA samples were retained before and after *three, eight, and 24 hours* of nitrogen deprivation.

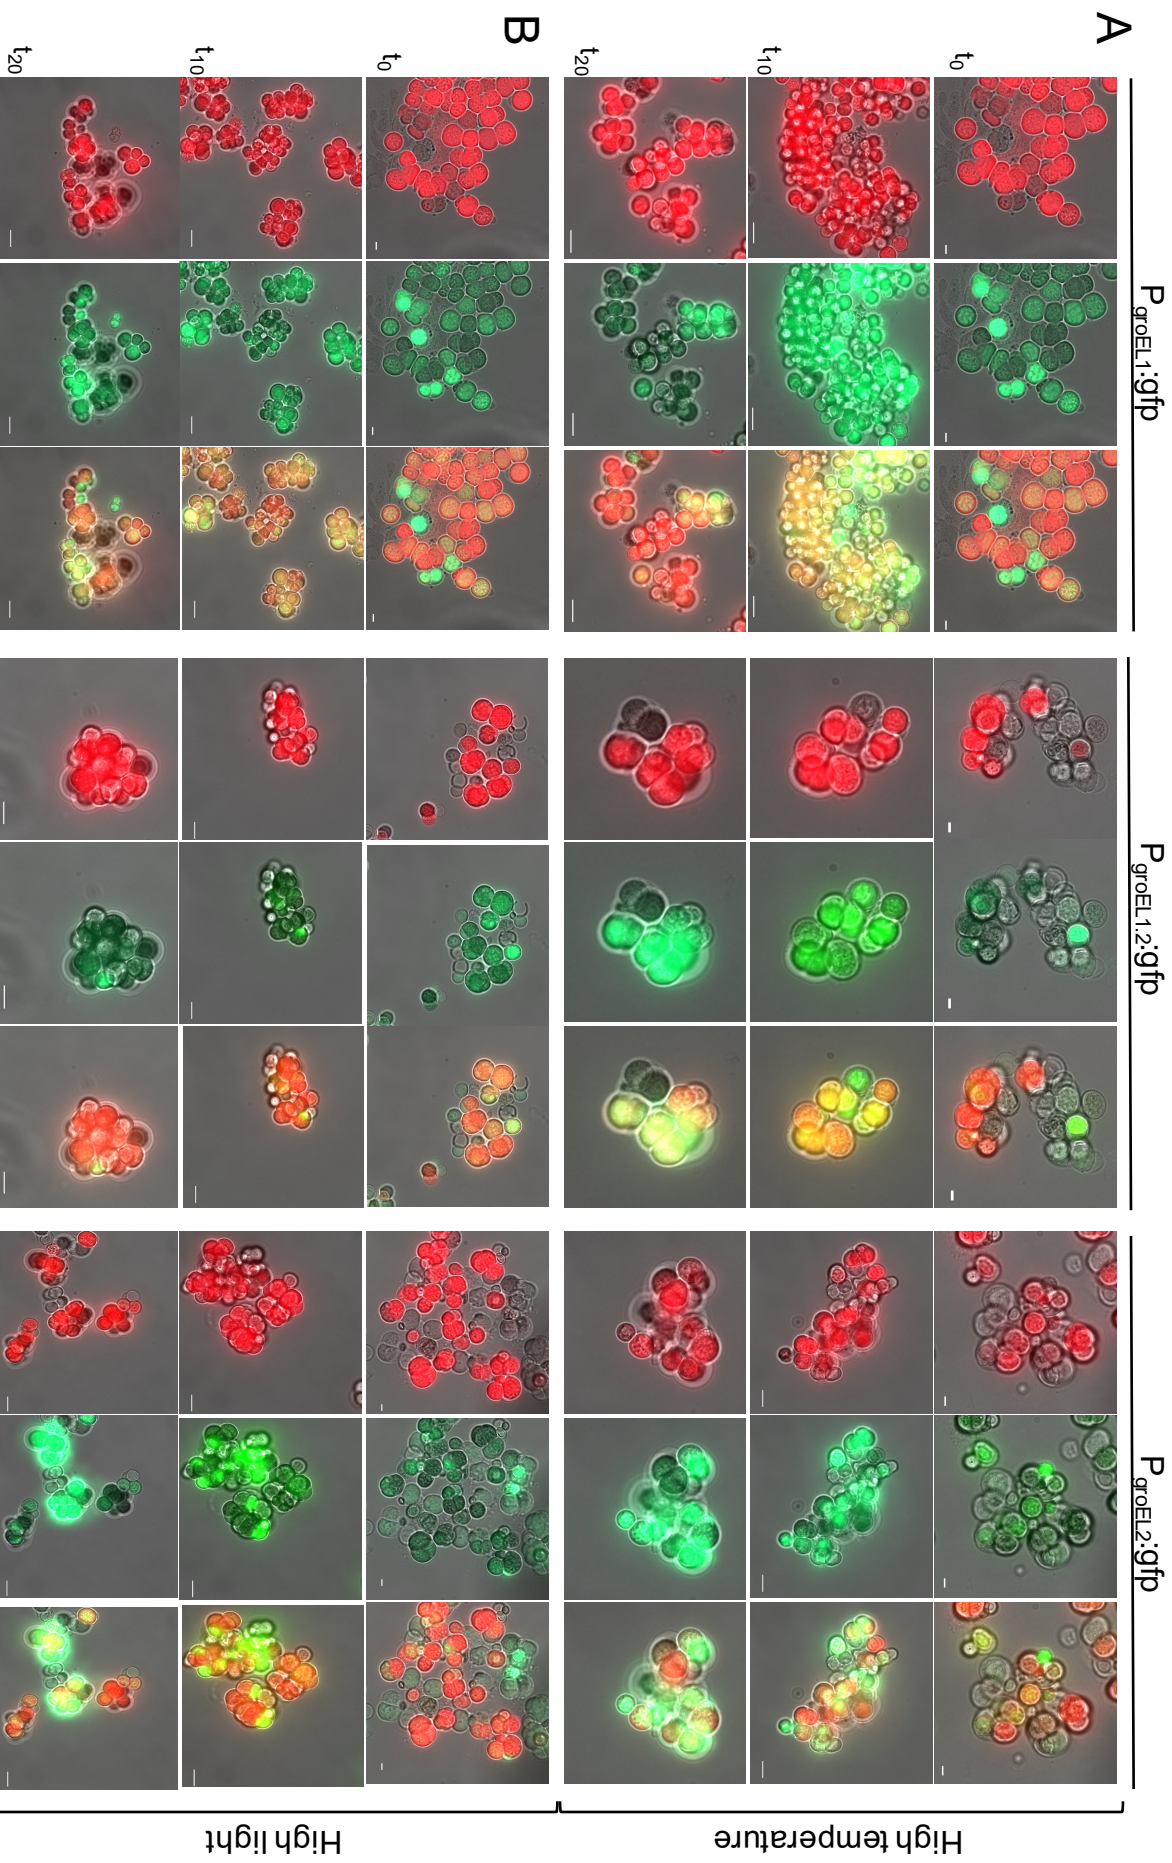

**Figure S4.** Expression of GFP under control of the different paralogous *groEL* promoters in *C. fritschii* PCC 6912. Merged bright-field plus Chlorophyll fluorescence (red signal); merged bright-field plus GFP fluorescence (green signal) ;and merged bright-field, Chlorophyll-and GFP-flourescence of *C. fritschii* under different growth conditions. (A) High temperature (B) High light. Scale bar represents 10  $\mu\text{m}$ .

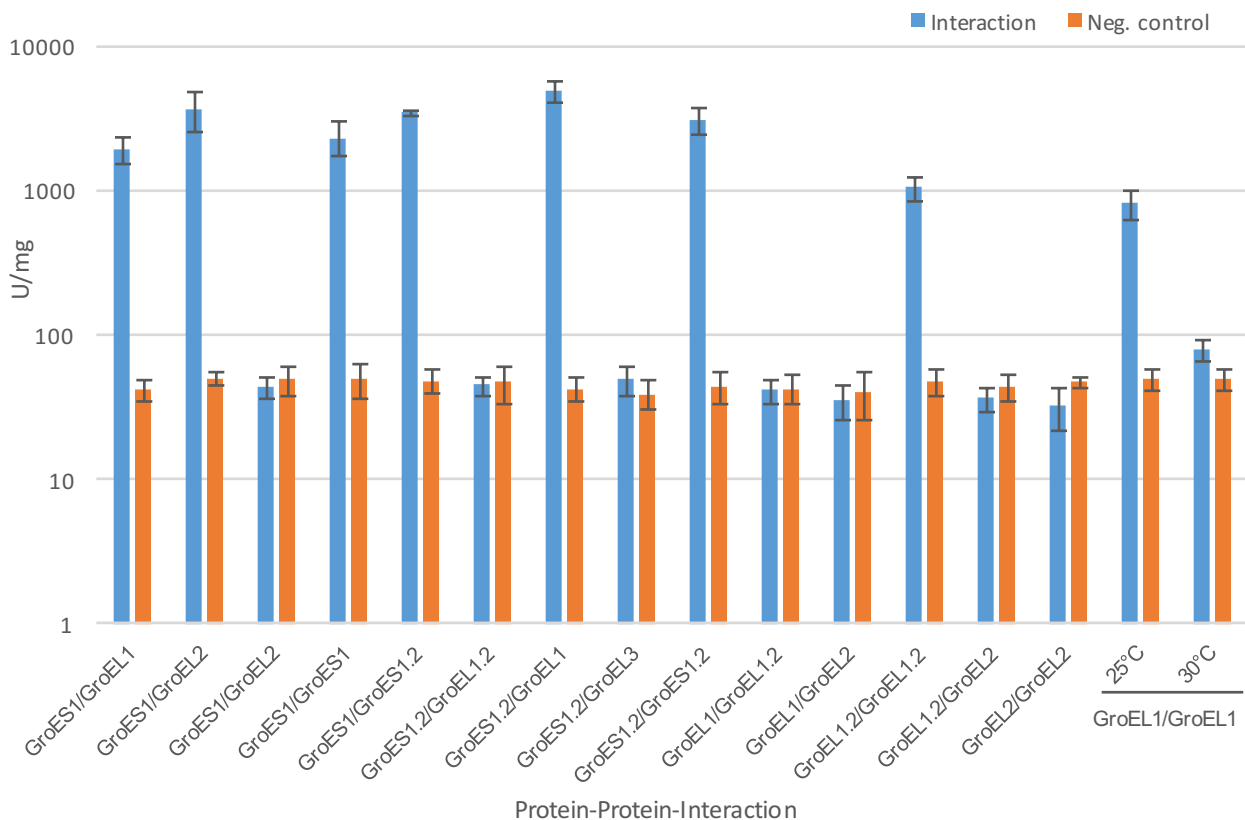

**Figure S5.** Beta-Galactosidase assay. Bargraphs showing  $\beta$ -galactosidase activity in the different samples. Lac Z enzyme activity was measured from three independent biological replicates.

**Table S1.** Classification of *groES/groEL* genes in cyanobacteria into paralogous gene classes.

| Subsection | Organism                          | Gene                          | Homolog        | Length | RefSeq ID      |
|------------|-----------------------------------|-------------------------------|----------------|--------|----------------|
| 1          | Acaryochloris_marina_MBIC11017    | groEL                         | groEL2         | 1676   | WP_010472301.1 |
| 1          | Acaryochloris_marina_MBIC11017    | groEL                         | groEL1         | 1631   | WP_012164713.1 |
| 1          | Acaryochloris_marina_MBIC11017    | groES                         | groEL1         | 311    | WP_010475295.1 |
| 1          | Acaryochloris_marina_MBIC11017    | groES                         | groES1.2       | 311    | WP_012167682.1 |
| 1          | Acaryochloris_marina_MBIC11017    | groEL                         | groEL1.2       | 1613   | WP_041661416.1 |
| 1          | Acaryochloris_sp_CCME_5410        | groEL                         | groEL2         | 1676   | WP_010472301.1 |
| 1          | Acaryochloris_sp_CCME_5410        | groES                         | groEL1         | 311    | WP_010475295.1 |
| 1          | Acaryochloris_sp_CCME_5410        | groEL                         | groEL1         | 1631   | WP_010475296.1 |
| 1          | Acaryochloris_sp_CCME_5410        | groEL                         | groEL1.2       | 1610   | WP_010476537.1 |
| 1          | Acaryochloris_sp_CCME_5410        | groES                         | groES1.2       | 311    | WP_010476538.1 |
| 1          | Chamaesiphon_minutus_PCC_6605     | groEL                         | groEL1         | 1640   | WP_015157755.1 |
| 1          | Chamaesiphon_minutus_PCC_6605     | groES                         | groEL1         | 311    | WP_015157756.1 |
| 1          | Chamaesiphon_minutus_PCC_6605     | groEL                         | groEL2         | 1676   | WP_015161862.1 |
| 1          | Crocospaera_watsonii_WH_8501      | groEL                         | groEL2         | 1688   | WP_007303269.1 |
| 1          | Crocospaera_watsonii_WH_8501      | groEL                         | groEL1         | 1622   | WP_007308122.1 |
| 1          | Crocospaera_watsonii_WH_8501      | groES                         | groEL1         | 311    | WP_007308121.1 |
| 1          | Cyanobacterium_aponinum_PCC_10605 | groES                         | groEL1         | 311    | WP_015218964.1 |
| 1          | Cyanobacterium_aponinum_PCC_10605 | groEL                         | groEL1         | 1625   | WP_015218965.1 |
| 1          | Cyanobacterium_aponinum_PCC_10605 | groEL                         | groEL2         | 1667   | WP_015219170.1 |
| 1          | Cyanobacterium_stanieri_PCC_7202  | groEL                         | groEL2         | 1664   | WP_015221313.1 |
| 1          | Cyanobacterium_stanieri_PCC_7202  | groEL                         | groEL1         | 1622   | WP_015223059.1 |
| 1          | Cyanobacterium_stanieri_PCC_7202  | groES                         | groEL1         | 311    | WP_015223060.1 |
| 1          | cyanobacterium_UCYN-A             | groEL                         | groEL2         | 1703   | WP_012953804.1 |
| 1          | cyanobacterium_UCYN-A             | groES                         | groEL1         | 311    | WP_012954133.1 |
| 1          | cyanobacterium_UCYN-A             | groEL                         | groEL1         | 1628   | WP_012954134.1 |
| 1          | Cyanobium_gracile_PCC_6307        | groEL                         | groEL1         | 1637   | WP_015110666.1 |
| 1          | Cyanobium_gracile_PCC_6307        | groES                         | groEL1         | 311    | WP_015110667.1 |
| 1          | Cyanobium_gracile_PCC_6307        | groEL                         | groEL2         | 1667   | WP_015110733.1 |
| 1          | Cyanobium_sp_PCC_7001             | groEL                         | groEL2         | 1655   | WP_006911651.1 |
| 1          | Cyanobium_sp_PCC_7001             | groES                         | groEL1         | 311    | WP_006910546.1 |
| 1          | Cyanobium_sp_PCC_7001             | groEL                         | groEL1         | 1634   | WP_006911407.1 |
| 1          | Cyanothece_sp_BH63E_ATCC_51472    | groES                         | groEL1         | 311    | WP_008278381.1 |
| 1          | Cyanothece_sp_BH63E_ATCC_51472    | groEL                         | groEL1         | 1622   | WP_009544164.1 |
| 1          | Cyanothece_sp_BH63E_ATCC_51472    | groEL                         | groEL2         | 1679   | WP_009545495.1 |
| 1          | Cyanothece_sp_BH68_ATCC_51142     | groES                         | groEL1         | 311    | WP_008278381.1 |
| 1          | Cyanothece_sp_BH68_ATCC_51142     | groEL                         | groEL1         | 1622   | WP_009544164.1 |
| 1          | Cyanothece_sp_BH68_ATCC_51142     | groEL                         | groEL2         | 1679   | WP_009545495.1 |
| 1          | Cyanothece_sp_CCY_0110            | groEL                         | groEL2         | 1688   | WP_008273166.1 |
| 1          | Cyanothece_sp_CCY_0110            | groEL                         | groEL1         | 1622   | WP_008278380.1 |
| 1          | Cyanothece_sp_CCY_0110            | groES                         | groEL1         | 311    | WP_008278381.1 |
| 1          | Cyanothece_sp_PCC_7424            | groEL                         | groEL1         | 1628   | WP_012599165.1 |
| 1          | Cyanothece_sp_PCC_7424            | groES                         | groEL1         | 311    | WP_012599166.1 |
| 1          | Cyanothece_sp_PCC_7424            | groEL                         | groEL2         | 1670   | WP_015954854.1 |
| 1          | Cyanothece_sp_PCC_7425            | groEL                         | groEL2         | 1661   | WP_012627767.1 |
| 1          | Cyanothece_sp_PCC_7425            | groEL                         | groEL1         | 1637   | WP_012630459.1 |
| 1          | Cyanothece_sp_PCC_7425            | groES                         | groEL1         | 311    | WP_012630460.1 |
| 1          | Cyanothece_sp_PCC_7822            | groES                         | groEL1         | 311    | WP_013320552.1 |
| 1          | Cyanothece_sp_PCC_7822            | groEL                         | groEL1         | 1631   | WP_013320553.1 |
| 1          | Cyanothece_sp_PCC_7822            | groEL                         | groEL2         | 1664   | WP_013324620.1 |
| 1          | Cyanothece_sp_PCC_8801            | groEL                         | groEL2         | 1667   | WP_012594532.1 |
| 1          | Cyanothece_sp_PCC_8801            | groEL                         | groEL1         | 1625   | WP_012596119.1 |
| 1          | Cyanothece_sp_PCC_8801            | groES                         | groEL1         | 311    | WP_012596120.1 |
| 1          | Cyanothece_sp_PCC_8802            | groEL                         | groEL2         | 1667   | WP_012594532.1 |
| 1          | Cyanothece_sp_PCC_8802            | groES                         | groEL1         | 311    | WP_012596120.1 |
| 1          | Cyanothece_sp_PCC_8802            | groEL                         | groEL1         | 1625   | WP_012596119.1 |
| 1          | Dactylococcopsis_salina_PCC_8305  | groES                         | groEL1         | 311    | WP_015228133.1 |
| 1          | Dactylococcopsis_salina_PCC_8305  | groEL                         | groEL1         | 1622   | WP_015228134.1 |
| 1          | Dactylococcopsis_salina_PCC_8305  | groEL                         | groEL2         | 1679   | WP_015230198.1 |
| 1          | Geminocystis_herdmanii_PCC_6308   | groES                         | groEL1         | 311    | WP_017294973.1 |
| 1          | Geminocystis_herdmanii_PCC_6308   | groEL                         | groEL1         | 1625   | WP_017294974.1 |
| 1          | Geminocystis_herdmanii_PCC_6308   | groEL                         | groEL2         | 1673   | WP_017295911.1 |
| 1          | Gloeobacter_violaceus_PCC_7421    | groEL                         | not determined | 1628   | NP_923973.1    |
| 1          | Gloeobacter_violaceus_PCC_7421    | groES                         | not determined | 311    | NP_923974.1    |
| 1          | Gloeobacter_violaceus_PCC_7421    | groES                         | not determined | 311    | NP_925842.1    |
| 1          | Gloeobacter_violaceus_PCC_7421    | groEL                         | not determined | 1661   | NP_925843.1    |
| 1          | Gloeobacter_violaceus_PCC_7421    | Thermosome-groEL2like protein | not determined | 1517   | NP_926694.1    |
| 1          | Gloeocapsa_sp_PCC_73106           | groES                         | groEL1         | 311    | WP_006530606.1 |
| 1          | Gloeocapsa_sp_PCC_73106           | groEL                         | groEL1         | 1625   | WP_006530607.1 |
| 1          | Gloeocapsa_sp_PCC_73106           | groEL                         | groEL2         | 1670   | WP_006528647.1 |
| 1          | Gloeocapsa_sp_PCC_7428            | groES                         | groEL1         | 311    | WP_015186660.1 |
| 1          | Gloeocapsa_sp_PCC_7428            | groEL                         | groEL1         | 1640   | WP_015186661.1 |
| 1          | Gloeocapsa_sp_PCC_7428            | groEL                         | groEL2         | 1649   | WP_015186725.1 |
| 1          | Halothece_sp_PCC_7418             | groES                         | groEL1         | 311    | WP_015225431.1 |
| 1          | Halothece_sp_PCC_7418             | groEL                         | groEL1         | 1625   | WP_015225432.1 |
| 1          | Halothece_sp_PCC_7418             | groEL                         | groEL2         | 1670   | WP_015225564.1 |
| 1          | Microcystis_aeruginosa_NIES-843   | groEL                         | groEL2         | 1673   | WP_002759846.1 |
| 1          | Microcystis_aeruginosa_NIES-843   | groES                         | groEL1         | 311    | WP_002737272.1 |
| 1          | Microcystis_aeruginosa_NIES-843   | groEL                         | groEL1         | 1625   | WP_012267175.1 |

|   |                                                 |       |        |      |                |
|---|-------------------------------------------------|-------|--------|------|----------------|
| 1 | Prochlorococcus_marinus_AS9601                  | groEL | groEL2 | 1745 | WP_011817963.1 |
| 1 | Prochlorococcus_marinus_AS9601                  | groEL | groEL1 | 1637 | WP_011819051.1 |
| 1 | Prochlorococcus_marinus_AS9601                  | groES | groEL1 | 311  | WP_011819052.1 |
| 1 | Prochlorococcus_marinus_marinus_CCMP_1375       | groEL | groEL2 | 1691 | NP_874842.1    |
| 1 | Prochlorococcus_marinus_marinus_CCMP_1375       | groEL | groEL1 | 1637 | NP_875980.1    |
| 1 | Prochlorococcus_marinus_marinus_CCMP_1375       | groES | groEL1 | 311  | NP_875981.1    |
| 1 | Prochlorococcus_marinus_MIT_9211                | groEL | groEL2 | 1697 | WP_012195004.1 |
| 1 | Prochlorococcus_marinus_MIT_9211                | groEL | groEL1 | 1631 | WP_012196107.1 |
| 1 | Prochlorococcus_marinus_MIT_9211                | groES | groEL1 | 311  | WP_012196108.1 |
| 1 | Prochlorococcus_marinus_MIT_9215                | groEL | groEL2 | 1790 | WP_041484443.1 |
| 1 | Prochlorococcus_marinus_MIT_9215                | groEL | groEL1 | 1637 | WP_002805622.1 |
| 1 | Prochlorococcus_marinus_MIT_9215                | groES | groEL1 | 311  | WP_002806275.1 |
| 1 | Prochlorococcus_marinus_MIT_9301                | groEL | groEL2 | 1745 | WP_011862474.1 |
| 1 | Prochlorococcus_marinus_MIT_9301                | groEL | groEL1 | 1637 | WP_011863549.1 |
| 1 | Prochlorococcus_marinus_MIT_9301                | groES | groEL1 | 311  | WP_002806275.1 |
| 1 | Prochlorococcus_marinus_MIT_9303                | groES | groEL1 | 500  | WP_011130818.1 |
| 1 | Prochlorococcus_marinus_MIT_9303                | groEL | groEL1 | 1634 | WP_011825179.1 |
| 1 | Prochlorococcus_marinus_MIT_9303                | groEL | groEL2 | 1694 | WP_011825321.1 |
| 1 | Prochlorococcus_marinus_MIT_9312                | groEL | groEL2 | 1754 | WP_011376011.1 |
| 1 | Prochlorococcus_marinus_MIT_9312                | groEL | groEL1 | 1637 | WP_011377072.1 |
| 1 | Prochlorococcus_marinus_MIT_9312                | groES | groEL1 | 311  | WP_011377073.1 |
| 1 | Prochlorococcus_marinus_MIT_9313                | groEL | groEL2 | 1700 | WP_011130702.1 |
| 1 | Prochlorococcus_marinus_MIT_9313                | groEL | groEL1 | 1634 | WP_011130817.1 |
| 1 | Prochlorococcus_marinus_MIT_9313                | groES | groEL1 | 311  | WP_011130818.1 |
| 1 | Prochlorococcus_marinus_MIT_9515                | groEL | groEL2 | 1763 | WP_011819831.1 |
| 1 | Prochlorococcus_marinus_MIT_9515                | groEL | groEL1 | 1634 | WP_011820917.1 |
| 1 | Prochlorococcus_marinus_MIT_9515                | groES | groEL1 | 311  | WP_011820918.1 |
| 1 | Prochlorococcus_marinus_MIT9202                 | groEL | groEL1 | 1637 | WP_002805622.1 |
| 1 | Prochlorococcus_marinus_MIT9202                 | groES | groEL1 | 311  | WP_002806275.1 |
| 1 | Prochlorococcus_marinus_MIT9202                 | groEL | groEL2 | 1745 | WP_041484443.1 |
| 1 | Prochlorococcus_marinus_NATL1A                  | groEL | groEL2 | 1691 | WP_011823251.1 |
| 1 | Prochlorococcus_marinus_NATL1A                  | groEL | groEL1 | 1631 | WP_011824379.1 |
| 1 | Prochlorococcus_marinus_NATL1A                  | groES | groEL1 | 311  | WP_011295315.1 |
| 1 | Prochlorococcus_marinus_NATL2A                  | groEL | groEL1 | 1631 | WP_011295314.1 |
| 1 | Prochlorococcus_marinus_NATL2A                  | groES | groEL1 | 311  | WP_011295315.1 |
| 1 | Prochlorococcus_marinus_NATL2A                  | groEL | groEL2 | 1682 | WP_011294416.1 |
| 1 | Prochlorococcus_marinus_pastoris_CCMP_1986      | groEL | groEL2 | 1745 | WP_011132088.1 |
| 1 | Prochlorococcus_marinus_pastoris_CCMP_1986      | groEL | groEL1 | 1634 | WP_011133065.1 |
| 1 | Prochlorococcus_marinus_pastoris_CCMP_1986      | groES | groEL1 | 311  | WP_011133066.1 |
| 1 | Prochlorococcus_sp_CC9311                       | groEL | groEL2 | 1661 | WP_011620049.1 |
| 1 | Prochlorococcus_sp_CC9311                       | groEL | groEL1 | 1631 | WP_011620191.1 |
| 1 | Prochlorococcus_sp_CC9311                       | groES | groEL1 | 311  | WP_011620192.1 |
| 1 | Prochlorococcus_sp_CC9605                       | groEL | groEL2 | 1679 | WP_011363619.1 |
| 1 | Prochlorococcus_sp_CC9605                       | groEL | groEL1 | 1634 | WP_006851861.1 |
| 1 | Prochlorococcus_sp_CC9605                       | groES | groEL1 | 311  | WP_011365113.1 |
| 1 | Prochlorococcus_sp_CC9902                       | groES | groEL1 | 311  | WP_011359322.1 |
| 1 | Prochlorococcus_sp_CC9902                       | groEL | groEL1 | 1634 | WP_009790474.1 |
| 1 | Prochlorococcus_sp_CC9902                       | groEL | groEL2 | 1688 | WP_011360511.1 |
| 1 | Prochlorococcus_sp_WH_7803                      | groEL | groEL2 | 1661 | WP_011933761.1 |
| 1 | Prochlorococcus_sp_WH_7803                      | groEL | groEL1 | 1634 | WP_011933891.1 |
| 1 | Prochlorococcus_sp_WH_7803                      | groES | groEL1 | 311  | WP_011933892.1 |
| 1 | Prochlorococcus_sp_WH8102                       | groES | groEL1 | 311  | WP_011127384.1 |
| 1 | Prochlorococcus_sp_WH8102                       | groEL | groEL1 | 1634 | WP_011127385.1 |
| 1 | Prochlorococcus_sp_WH8102                       | groEL | groEL2 | 1688 | WP_011128712.1 |
| 1 | Synechococcus_elongatus_PCC_6301                | groEL | groEL2 | 1667 | WP_011243156.1 |
| 1 | Synechococcus_elongatus_PCC_6301                | groES | groEL1 | 311  | WP_011244098.1 |
| 1 | Synechococcus_elongatus_PCC_6301                | groEL | groEL1 | 1634 | WP_011244099.1 |
| 1 | Synechococcus_elongatus_PCC_7942                | groEL | groEL2 | 1667 | WP_011243156.1 |
| 1 | Synechococcus_elongatus_PCC_7942                | groEL | groEL1 | 1634 | WP_011244099.1 |
| 1 | Synechococcus_elongatus_PCC_7942                | groES | groEL1 | 311  | WP_011244098.1 |
| 1 | Synechococcus_elongatus_PCC_7942_updateJune2012 | groEL | groEL2 | 1667 | WP_011243156.1 |
| 1 | Synechococcus_elongatus_PCC_7942_updateJune2012 | groEL | groEL1 | 1634 | WP_011244099.1 |
| 1 | Synechococcus_elongatus_PCC_7942_updateJune2012 | groES | groEL1 | 311  | WP_011244098.1 |
| 1 | Synechococcus_sp_BL107                          | groEL | groEL1 | 1634 | WP_009790474.1 |
| 1 | Synechococcus_sp_BL107                          | groES | groEL1 | 311  | WP_009790475.1 |
| 1 | Synechococcus_sp_BL107                          | groEL | groEL2 | 1688 | WP_009789173.1 |
| 1 | Synechococcus_sp_CB0101                         | groEL | groEL2 | 1667 | WP_010303792.1 |
| 1 | Synechococcus_sp_CB0101                         | groEL | groEL1 | 1631 | WP_010310877.1 |
| 1 | Synechococcus_sp_CB0101                         | groES | groEL1 | 311  | WP_010310879.1 |
| 1 | Synechococcus_sp_CB0205                         | groES | groEL1 | 311  | WP_010315361.1 |
| 1 | Synechococcus_sp_CB0205                         | groEL | groEL1 | 1634 | WP_010315362.1 |
| 1 | Synechococcus_sp_CB0205                         | groEL | groEL2 | 1661 | WP_010318014.1 |
| 1 | Synechococcus_sp_CC9616                         | groEL | groEL2 | 1715 | WP_028951375.1 |
| 1 | Synechococcus_sp_CC9616                         | groEL | groEL1 | 1634 | WP_028952751.1 |
| 1 | Synechococcus_sp_CC9616                         | groES | groEL1 | 311  | WP_028952752.1 |
| 1 | Synechococcus_sp_JA-2-3Ba2-13                   | groEL | groEL1 | 1634 | WP_011433224.1 |
| 1 | Synechococcus_sp_JA-2-3Ba2-13                   | groES | groEL1 | 311  | WP_011433225.1 |
| 1 | Synechococcus_sp_JA-2-3Ba2-13                   | groEL | groEL2 | 1619 | WP_011433315.1 |
| 1 | Synechococcus_sp_JA-3-3Ab                       | groEL | groEL2 | 1628 | WP_011429241.1 |



|   |                                    |       |                |      |                |
|---|------------------------------------|-------|----------------|------|----------------|
| 1 | Synechococcus_sp_JA-3-3Ab          | groES | groEL1         | 311  | WP_011430254.1 |
| 1 | Synechococcus_sp_JA-3-3Ab          | groEL | groEL1         | 1634 | WP_011430255.1 |
| 1 | Synechococcus_sp_PCC_6312          | groEL | groEL2         | 1661 | WP_015123389.1 |
| 1 | Synechococcus_sp_PCC_6312          | groES | groEL1         | 311  | WP_015124241.1 |
| 1 | Synechococcus_sp_PCC_6312          | groEL | groEL1         | 1637 | WP_015124242.1 |
| 1 | Synechococcus_sp_PCC_7002          | groEL | groEL2         | 1667 | WP_012305785.1 |
| 1 | Synechococcus_sp_PCC_7002          | groES | groEL1         | 311  | WP_012308053.1 |
| 1 | Synechococcus_sp_PCC_7002          | groEL | groEL1         | 1625 | WP_012308054.1 |
| 1 | Synechococcus_sp_PCC_7335          | groES | groEL1         | 314  | WP_006456873.1 |
| 1 | Synechococcus_sp_PCC_7335          | groEL | groEL1         | 1571 | WP_038015768.1 |
| 1 | Synechococcus_sp_PCC_7335          | groEL | not determined | 1679 | WP_006456066.1 |
| 1 | Synechococcus_sp_PCC_7335          | groEL | not determined | 1625 | WP_006457968.1 |
| 1 | Synechococcus_sp_PCC_7336          | groEL | groES1.2       | 1670 | WP_017324774.1 |
| 1 | Synechococcus_sp_PCC_7336          | groES | groEL1.2       | 311  | WP_017324775.1 |
| 1 | Synechococcus_sp_PCC_7336          | groES | groEL1         | 311  | WP_017326109.1 |
| 1 | Synechococcus_sp_PCC_7336          | groEL | groEL1         | 1628 | WP_017326110.1 |
| 1 | Synechococcus_sp_PE_A1_60AY6Li     | groES | groEL1         | 311  | WP_011430254.1 |
| 1 | Synechococcus_sp_PE_A1_60AY6Li     | groEL | groEL1         | 1634 | WP_011430255.1 |
| 1 | Synechococcus_sp_PE_A1_60AY6Li     | groEL | groEL2         | 1628 | WP_011429241.1 |
| 1 | Synechococcus_sp_PE_A1-1_60AY4M2   | groEL | groEL1         | 1634 | WP_011430255.1 |
| 1 | Synechococcus_sp_PE_A1-1_60AY4M2   | groES | groEL1         | 311  | WP_011433225.1 |
| 1 | Synechococcus_sp_PE_A1-1_60AY4M2   | groEL | groEL2         | 1628 | WP_011429241.1 |
| 1 | Synechococcus_sp_PE_A1-1_63AY4M1   | groEL | groEL1         | 1634 | WP_011430255.1 |
| 1 | Synechococcus_sp_PE_A1-1_63AY4M1   | groES | groEL1         | 311  | WP_011430254.1 |
| 1 | Synechococcus_sp_PE_A1-1_63AY4M1   | groEL | groEL2         | 1628 | WP_011429241.1 |
| 1 | Synechococcus_sp_PE_A1-1_65AY640   | groEL | groEL1         | 1634 | WP_011430255.1 |
| 1 | Synechococcus_sp_PE_A1-1_65AY640   | groES | groEL1         | 311  | WP_011433225.1 |
| 1 | Synechococcus_sp_PE_A1-1_65AY640   | groEL | groEL2         | 1628 | WP_011429241.1 |
| 1 | Synechococcus_sp_PE_A4_65AY6A5     | groEL | groEL2         | 1628 | WP_011429241.1 |
| 1 | Synechococcus_sp_PE_A4_65AY6A5     | groES | groEL1         | 311  | WP_011429241.1 |
| 1 | Synechococcus_sp_PE_A4_65AY6A5     | groEL | groEL1         | 1634 | WP_011430255.1 |
| 1 | Synechococcus_sp_PE_A6_63AY4M2     | groEL | groEL1         | 1634 | WP_011430255.1 |
| 1 | Synechococcus_sp_PE_A6_63AY4M2     | groES | groEL1         | 311  | WP_011433225.1 |
| 1 | Synechococcus_sp_PE_A6_63AY4M2     | groEL | groEL2         | 1628 | WP_011429241.1 |
| 1 | Synechococcus_sp_RCC_307           | groEL | groEL2         | 422  | WP_011935674.1 |
| 1 | Synechococcus_sp_RCC_307           | groEL | groEL1         | 1643 | WP_011936275.1 |
| 1 | Synechococcus_sp_RCC_307           | groES | groEL1         | 368  | WP_043737222.1 |
| 1 | Synechococcus_sp_RS9916            | groEL | groEL2         | 1667 | WP_007098631.1 |
| 1 | Synechococcus_sp_RS9916            | groEL | groEL1         | 1634 | WP_007098818.1 |
| 1 | Synechococcus_sp_RS9916            | groES | groEL1         | 311  | WP_007098819.1 |
| 1 | Synechococcus_sp_RS9917            | groES | groEL1         | 311  | WP_007101657.1 |
| 1 | Synechococcus_sp_RS9917            | groEL | groEL1         | 1634 | WP_007101658.1 |
| 1 | Synechococcus_sp_RS9917            | groEL | groEL2         | 1688 | WP_038001879.1 |
| 1 | Synechococcus_sp_WH_8016           | groES | groEL1         | 311  | WP_006854300.1 |
| 1 | Synechococcus_sp_WH_8016           | groEL | groEL1         | 1631 | WP_006854299.1 |
| 1 | Synechococcus_sp_WH_8016           | groEL | groEL2         | 1661 | WP_006853514.1 |
| 1 | Synechococcus_sp_WH_8109           | groES | groEL1         | 311  | WP_006850452.1 |
| 1 | Synechococcus_sp_WH_8109           | groEL | groEL1         | 1634 | WP_006851861.1 |
| 1 | Synechococcus_sp_WH_8109           | groEL | groEL2         | 1703 | WP_025362127.1 |
| 1 | Synechococcus_sp_WH5701            | groEL | groEL1         | 1634 | WP_006171951.1 |
| 1 | Synechococcus_sp_WH5701            | groES | groEL1         | 311  | WP_006171952.1 |
| 1 | Synechococcus_sp_WH5701            | groEL | groEL2         | 1532 | N.A            |
| 1 | Synechococcus_sp_WH7805            | groES | groEL1         | 311  | WP_006043324.1 |
| 1 | Synechococcus_sp_WH7805            | groEL | groEL1         | 1634 | WP_006043325.1 |
| 1 | Synechococcus_sp_WH7805            | groEL | groEL2         | 1670 | WP_006043511.1 |
| 1 | Synechocystis_sp_PCC_6803          | groES | groEL1         | 320  | WP_020861555.1 |
| 1 | Synechocystis_sp_PCC_6803          | groEL | groEL1         | 1625 | WP_010872041.1 |
| 1 | Synechocystis_sp_PCC_6803          | groEL | groEL2         | 1658 | WP_010873466.1 |
| 1 | Synechocystis_sp_PCC_6803_GT-I     | groES | groEL1         | 320  | WP_020861555.1 |
| 1 | Synechocystis_sp_PCC_6803_GT-I     | groEL | groEL1         | 1625 | WP_010872041.1 |
| 1 | Synechocystis_sp_PCC_6803_GT-I     | groEL | groEL2         | 1658 | WP_010873466.1 |
| 1 | Synechocystis_sp_PCC_6803_GT-S     | groES | groEL1         | 320  | WP_020861555.1 |
| 1 | Synechocystis_sp_PCC_6803_GT-S     | groEL | groEL1         | 1625 | WP_010872041.1 |
| 1 | Synechocystis_sp_PCC_6803_GT-S     | groEL | groEL2         | 1658 | WP_010873466.1 |
| 1 | Synechocystis_sp_PCC_6803_PCC-N    | groES | groEL1         | 320  | WP_020861555.1 |
| 1 | Synechocystis_sp_PCC_6803_PCC-N    | groEL | groEL1         | 1625 | WP_010872041.1 |
| 1 | Synechocystis_sp_PCC_6803_PCC-N    | groEL | groEL2         | 1658 | WP_010873466.1 |
| 1 | Synechocystis_sp_PCC_7509          | groEL | groEL2         | 1664 | WP_009632953.1 |
| 1 | Synechocystis_sp_PCC_7509          | groEL | groEL1         | 1637 | WP_009633919.1 |
| 1 | Synechocystis_sp_PCC_7509          | groES | groEL1         | 311  | WP_009633920.1 |
| 1 | Thermosynechococcus_elongatus_BP-1 | groEL | groEL1         | 1637 | NP_680976.1    |
| 1 | Thermosynechococcus_elongatus_BP-1 | groES | groEL1         | 311  | NP_680977.1    |
| 1 | Thermosynechococcus_elongatus_BP-1 | groEL | groEL2         | 1631 | NP_682202.1    |
| 2 | Chroococciopsis_sp_PCC_6712        | groES | groEL1         | 311  | N. A (JGI)     |
| 2 | Chroococciopsis_sp_PCC_6712        | groEL | groEL1         | 1625 | N. A (JGI)     |
| 2 | Chroococciopsis_sp_PCC_6712        | groEL | groEL2         | 1670 | N. A (JGI)     |
| 2 | Chroococciopsis_thermalis_PCC_7203 | groEL | groEL2         | 1667 | WP_015152570.1 |
| 2 | Chroococciopsis_thermalis_PCC_7203 | groEL | groEL1         | 1640 | WP_015152680.1 |
| 2 | Chroococciopsis_thermalis_PCC_7203 | groES | groEL1         | 335  | WP_039713348.1 |

|   |                                                 |       |                |      |                |
|---|-------------------------------------------------|-------|----------------|------|----------------|
| 2 | Pleurocapsa_sp_PCC_7319                         | groEL | groEL2         | 1679 | WP_019504182.1 |
| 2 | Pleurocapsa_sp_PCC_7319                         | groEL | groEL1         | 1625 | WP_019506109.1 |
| 2 | Pleurocapsa_sp_PCC_7319                         | groES | groEL1         | 311  | WP_019506110.1 |
| 2 | Pleurocapsa_sp_PCC_7327                         | groEL | groEL1         | 1634 | WP_015142261.1 |
| 2 | Pleurocapsa_sp_PCC_7327                         | groES | groEL1         | 311  | WP_015142262.1 |
| 2 | Pleurocapsa_sp_PCC_7327                         | groEL | groEL2         | 1652 | WP_015142786.1 |
| 2 | Stanieria_cyanosphaera_PCC_7437                 | groEL | groEL1         | 1625 | WP_015193018.1 |
| 2 | Stanieria_cyanosphaera_PCC_7437                 | groES | groEL1         | 311  | WP_015193019.1 |
| 2 | Stanieria_cyanosphaera_PCC_7437                 | groEL | groEL2         | 1664 | WP_015195459.1 |
| 2 | Xenococcus_sp_PCC_7305                          | groEL | groEL1         | 1622 | WP_006511386.1 |
| 2 | Xenococcus_sp_PCC_7305                          | groES | groEL1         | 311  | WP_006511387.1 |
| 2 | Xenococcus_sp_PCC_7305                          | groEL | groEL2         | 1685 | WP_006510424.1 |
| 3 | Arthrospira_maxima_CS-328                       | groEL | groEL2         | 1676 | WP_006625833.1 |
| 3 | Arthrospira_maxima_CS-328                       | groEL | groEL1         | 1637 | WP_006622402.1 |
| 3 | Arthrospira_maxima_CS-328                       | groES | groEL1         | 311  | WP_006618364.1 |
| 3 | Arthrospira_platensis_C1_Draft2_circular_genome | groES | groEL1         | 311  | WP_006618364.1 |
| 3 | Arthrospira_platensis_C1_Draft2_circular_genome | groEL | groEL1         | 1637 | WP_006622402.1 |
| 3 | Arthrospira_platensis_C1_Draft2_circular_genome | groEL | groEL2         | 1676 | WP_006625833.1 |
| 3 | Arthrospira_platensis_NIES-39                   | groES | groEL1         | 311  | WP_006618364.1 |
| 3 | Arthrospira_platensis_NIES-39                   | groEL | groEL1         | 1637 | WP_006618363.1 |
| 3 | Arthrospira_platensis_NIES-39                   | groEL | groEL2         | 1676 | WP_014276880.1 |
| 3 | Arthrospira_platensis_Paraca                    | groEL | groEL2         | 1627 | WP_014276880.1 |
| 3 | Arthrospira_platensis_Paraca                    | groEL | groEL1         | 1637 | WP_006618363.1 |
| 3 | Arthrospira_platensis_Paraca                    | groES | groEL1         | 311  | WP_006618364.1 |
| 3 | Arthrospira_sp_PCC_8005                         | groEL | groEL2         | 1676 | WP_006625833.1 |
| 3 | Arthrospira_sp_PCC_8005                         | groES | groEL1         | 311  | WP_006618364.1 |
| 3 | Arthrospira_sp_PCC_8005                         | groEL | groEL1         | 1637 | WP_006622402.1 |
| 3 | Crinalium_epipsammum_PCC_9333                   | groEL | groEL2         | 1676 | WP_015201979.1 |
| 3 | Crinalium_epipsammum_PCC_9333                   | groEL | groEL1         | 1637 | WP_015202370.1 |
| 3 | Crinalium_epipsammum_PCC_9333                   | groES | groEL1         | 311  | WP_015202371.1 |
| 3 | Cyanobacterium_sp_ESFC-1                        | groES | groEL1         | 311  | WP_018398606.1 |
| 3 | Cyanobacterium_sp_ESFC-1                        | groEL | groEL1         | 1622 | WP_018398607.1 |
| 3 | Cyanobacterium_sp_ESFC-1                        | groEL | groEL2         | 1685 | WP_018399554.1 |
| 3 | Cyanobacterium_sp_JSC-1                         | groEL | groEL1.2       | 1628 | WP_035999449.1 |
| 3 | Cyanobacterium_sp_JSC-1                         | groES | groES1.2       | 311  | WP_035999452.1 |
| 3 | Cyanobacterium_sp_JSC-1                         | groEL | groEL2         | 1676 | WP_036001242.1 |
| 3 | Cyanobacterium_sp_JSC-1                         | groES | groEL1         | 311  | WP_035999452.1 |
| 3 | Cyanobacterium_sp_JSC-1                         | groEL | groEL1         | 1637 | WP_036004427.1 |
| 3 | Geitlerinema_sp_PCC_7105                        | groEL | groEL2         | 1682 | WP_017663465.1 |
| 3 | Geitlerinema_sp_PCC_7105                        | groES | groEL1         | 311  | WP_026097753.1 |
| 3 | Geitlerinema_sp_PCC_7105                        | groEL | groEL1         | 1637 | WP_017661781.1 |
| 3 | Geitlerinema_sp_PCC_7407                        | groEL | groEL2         | 1670 | WP_015170801.1 |
| 3 | Geitlerinema_sp_PCC_7407                        | groEL | groEL1         | 1637 | WP_015172922.1 |
| 3 | Geitlerinema_sp_PCC_7407                        | groES | groEL1         | 311  | WP_015172923.1 |
| 3 | Leptolyngbya_boryana_PCC_6306                   | groES | groEL1         | 311  | WP_017286920.1 |
| 3 | Leptolyngbya_boryana_PCC_6306                   | groEL | groEL1         | 1640 | WP_026148478.1 |
| 3 | Leptolyngbya_boryana_PCC_6306                   | groEL | groEL2         | 1667 | WP_017288542.1 |
| 3 | Leptolyngbya_sp_PCC_6406                        | groES | not determined | 311  | WP_008310159.1 |
| 3 | Leptolyngbya_sp_PCC_6406                        | groES | groEL1         | 311  | WP_008312546.1 |
| 3 | Leptolyngbya_sp_PCC_6406                        | groEL | groEL1         | 1637 | WP_008312275.1 |
| 3 | Leptolyngbya_sp_PCC_6406                        | groEL | groEL2         | 1748 | WP_027269099.1 |
| 3 | Leptolyngbya_sp_PCC_7375                        | groEL | not determined | 1586 | WP_006513616.1 |
| 3 | Leptolyngbya_sp_PCC_7375                        | groEL | groEL1.2       | 1616 | WP_006513937.1 |
| 3 | Leptolyngbya_sp_PCC_7375                        | groES | groES1.2       | 311  | WP_006513938.1 |
| 3 | Leptolyngbya_sp_PCC_7375                        | groEL | not determined | 1679 | WP_006515196.1 |
| 3 | Leptolyngbya_sp_PCC_7375                        | groEL | groEL1         | 1628 | WP_006516273.1 |
| 3 | Leptolyngbya_sp_PCC_7375                        | groES | groEL1         | 311  | WP_006516274.1 |
| 3 | Leptolyngbya_sp_PCC_7376                        | groEL | groEL2         | 1679 | WP_015134386.1 |
| 3 | Leptolyngbya_sp_PCC_7376                        | groEL | groEL1         | 1625 | WP_015135231.1 |
| 3 | Leptolyngbya_sp_PCC_7376                        | groES | groEL1         | 311  | WP_015135232.1 |
| 3 | Lyngbya_sp_CCY_8106                             | groEL | groEL2         | 1694 | WP_009786498.1 |
| 3 | Lyngbya_sp_CCY_8106                             | groES | groEL1         | 311  | WP_009787538.1 |
| 3 | Lyngbya_sp_CCY_8106                             | groEL | groEL1         | 1631 | WP_009787539.1 |
| 3 | Microcoleus_chthonoplastes_PCC_7420             | groEL | groEL2         | 1673 | WP_006099811.1 |
| 3 | Microcoleus_chthonoplastes_PCC_7420             | groES | groEL1         | 311  | WP_006101488.1 |
| 3 | Microcoleus_chthonoplastes_PCC_7420             | groEL | groEL1         | 1628 | WP_006101523.1 |
| 3 | Microcoleus_sp_PCC_7113                         | groEL | groEL1         | 1640 | WP_015184308.1 |
| 3 | Microcoleus_sp_PCC_7113                         | groES | groEL1         | 311  | WP_015184309.1 |
| 3 | Microcoleus_sp_PCC_7113                         | groEL | groEL2         | 1673 | WP_015185157.1 |
| 3 | Nodosilinea_nodulosa_PCC_7104                   | groEL | groEL2         | 1673 | WP_017296590.1 |
| 3 | Nodosilinea_nodulosa_PCC_7104                   | groEL | groEL1.2       | 1634 | WP_017298742.1 |
| 3 | Nodosilinea_nodulosa_PCC_7104                   | groES | groES1.2       | 311  | WP_017298743.1 |
| 3 | Nodosilinea_nodulosa_PCC_7104                   | groEL | groEL1         | 1631 | WP_026072825.1 |
| 3 | Nodosilinea_nodulosa_PCC_7104                   | groES | groEL1         | 311  | WP_017299961.1 |
| 3 | Oscillatoria_acuminata_PCC_6304                 | groEL | groEL1         | 1634 | WP_015147151.1 |
| 3 | Oscillatoria_acuminata_PCC_6304                 | groES | groEL1         | 311  | WP_015147152.1 |
| 3 | Oscillatoria_acuminata_PCC_6304                 | groEL | groEL2         | 1688 | WP_015149515.1 |
| 3 | Oscillatoria_formosa_PCC_6407                   | groES | groEL1         | 311  | WP_007353484.1 |
| 3 | Oscillatoria_formosa_PCC_6407                   | groEL | groEL1         | 1640 | WP_007353485.1 |

|   |                                       |       |          |      |                |
|---|---------------------------------------|-------|----------|------|----------------|
| 3 | Oscillatoria_formosa_PCC_6407         | groEL | groEL2   | 1688 | WP_007353288.1 |
| 3 | Oscillatoria_nigro-viridis_PCC_7112   | groEL | groEL1   | 1643 | WP_015174510.1 |
| 3 | Oscillatoria_nigro-viridis_PCC_7112   | groES | groEL1   | 311  | WP_006633072.1 |
| 3 | Oscillatoria_nigro-viridis_PCC_7112   | groEL | groEL2   | 1682 | WP_015177119.1 |
| 3 | Oscillatoria_sp_PCC_10802             | groEL | groEL2   | 1667 | WP_017715999.1 |
| 3 | Oscillatoria_sp_PCC_10802             | groEL | groEL1   | 1640 | WP_017717869.1 |
| 3 | Oscillatoria_sp_PCC_10802             | groES | groEL1   | 311  | WP_017717870.1 |
| 3 | Oscillatoria_sp_PCC_6506              | groEL | groEL2   | 1688 | WP_007353288.1 |
| 3 | Oscillatoria_sp_PCC_6506              | groES | groEL1   | 311  | WP_007353484.1 |
| 3 | Oscillatoria_sp_PCC_6506              | groEL | groEL1   | 1640 | WP_007353485.1 |
| 3 | Oscillatoriales_sp_JSC-12             | groEL | groEL2   | 1649 | WP_009554131.1 |
| 3 | Oscillatoriales_sp_JSC-12             | groES | groEL2   | 344  | WP_051164050.1 |
| 3 | Oscillatoriales_sp_JSC-12             | groEL | groEL1   | 1637 | WP_009768317.1 |
| 3 | Oscillatoriales_sp_JSC-12             | groES | groES1   | 311  | WP_009768318.1 |
| 3 | Prochlorothrix_hollandica_PCC_9006    | groEL | groEL1   | 1631 | WP_017713500.1 |
| 3 | Prochlorothrix_hollandica_PCC_9006    | groES | groES1   | 311  | WP_016925061.1 |
| 3 | Prochlorothrix_hollandica_PCC_9006    | groEL | groEL2   | 1679 | WP_017711036.1 |
| 3 | Pseudanabaena_sp_PCC_6802             | groES | groES1.2 | 311  | WP_026103227.1 |
| 3 | Pseudanabaena_sp_PCC_6802             | groEL | groEL1.2 | 1661 | WP_019500096.1 |
| 3 | Pseudanabaena_sp_PCC_6802             | groEL | groEL1   | 1628 | WP_019501755.1 |
| 3 | Pseudanabaena_sp_PCC_6802             | groES | groES1   | 311  | WP_019501756.1 |
| 3 | Pseudanabaena_sp_PCC_7367             | groEL | groEL1   | 1628 | WP_015165256.1 |
| 3 | Pseudanabaena_sp_PCC_7367             | groES | groES1   | 308  | WP_015165257.1 |
| 3 | Pseudanabaena_sp_PCC_7367             | groES | groES1   | 311  | WP_015165610.1 |
| 3 | Pseudanabaena_sp_PCC_7367             | groEL | groEL1.2 | 1664 | WP_015165611.1 |
| 3 | Pseudanabaena_sp_PCC_7429             | groEL | groEL1   | 1634 | WP_009629537.1 |
| 3 | Pseudanabaena_sp_PCC_7429             | groES | groES1   | 311  | WP_009629538.1 |
| 3 | Pseudanabaena_sp_PCC_7429             | groEL | groEL1.2 | 1664 | WP_009626159.1 |
| 3 | Pseudanabaena_sp_PCC_7429             | groES | groES1.2 | 311  | WP_009626160.1 |
| 3 | Spirulina_major_PCC_6313              | groES | groES1   | 311  | N. A (JGI)     |
| 3 | Spirulina_major_PCC_6313              | groEL | groEL1   | 1625 | N. A (JGI)     |
| 3 | Spirulina_major_PCC_6313              | groEL | groEL2   | 1673 | N. A (JGI)     |
| 3 | Spirulina_subsalsa_PCC_9445           | groEL | groEL2   | 1667 | WP_017303097.1 |
| 3 | Spirulina_subsalsa_PCC_9445           | groES | groES1   | 314  | WP_026079937.1 |
| 3 | Spirulina_subsalsa_PCC_9445           | groEL | groEL1   | 1625 | WP_017306382.1 |
| 3 | Trichodesmium_erythraeum_IMS101       | groEL | groEL2   | 1685 | WP_011610149.1 |
| 3 | Trichodesmium_erythraeum_IMS101       | groES | groES1   | 311  | WP_011613645.1 |
| 3 | Trichodesmium_erythraeum_IMS101       | groEL | groEL1   | 1634 | WP_011613646.1 |
| 4 | Anabaena_cylindrica_PCC_7122          | groEL | groEL2   | 1718 | WP_015216715.1 |
| 4 | Anabaena_cylindrica_PCC_7122          | groEL | groEL1   | 1637 | WP_015217475.1 |
| 4 | Anabaena_cylindrica_PCC_7122          | groES | groES1   | 311  | WP_015217477.1 |
| 4 | Anabaena_sp_PCC_7108                  | groEL | groEL2   | 1664 | WP_016949529.1 |
| 4 | Anabaena_sp_PCC_7108                  | groES | groES1   | 311  | WP_016951426.1 |
| 4 | Anabaena_sp_PCC_7108                  | groEL | groEL1   | 1637 | WP_016951427.1 |
| 4 | Anabaena_variabilis_ATCC_29413        | groEL | groEL1.2 | 1637 | WP_011316758.1 |
| 4 | Anabaena_variabilis_ATCC_29413        | groES | groES1.2 | 311  | WP_011316757.1 |
| 4 | Anabaena_variabilis_ATCC_29413        | groEL | groEL1   | 1634 | WP_011320337.1 |
| 4 | Anabaena_variabilis_ATCC_29413        | groES | groES1   | 311  | WP_010997805.1 |
| 4 | Anabaena_variabilis_ATCC_29413        | groEL | groEL2   | 1682 | WP_011320465.1 |
| 4 | Calothrix_sp_PCC_6303                 | groEL | groEL2   | 1709 | WP_041739258.1 |
| 4 | Calothrix_sp_PCC_6303                 | groEL | groEL1   | 1637 | WP_015200995.1 |
| 4 | Calothrix_sp_PCC_6303                 | groES | groES1   | 335  | WP_041740016.1 |
| 4 | Calothrix_sp_PCC_7103                 | groEL | groEL2   | 1679 | WP_006625833.1 |
| 4 | Calothrix_sp_PCC_7103                 | groES | groES1.2 | 311  | WP_019490874.1 |
| 4 | Calothrix_sp_PCC_7103                 | groEL | groEL1.2 | 1628 | WP_019490875.1 |
| 4 | Calothrix_sp_PCC_7103                 | groES | groES1   | 314  | WP_019491741.1 |
| 4 | Calothrix_sp_PCC_7103                 | groEL | groEL1   | 1640 | WP_019491742.1 |
| 4 | Calothrix_sp_PCC_7507                 | groEL | groEL2   | 1679 | WP_015127399.1 |
| 4 | Calothrix_sp_PCC_7507                 | groES | groES1   | 311  | WP_015130973.1 |
| 4 | Calothrix_sp_PCC_7507                 | groEL | groEL1   | 1634 | WP_015130974.1 |
| 4 | Cylindrospermopsis_raciborskii_CS-505 | groES | groES1   | 311  | WP_006278399.1 |
| 4 | Cylindrospermopsis_raciborskii_CS-505 | groEL | groEL1   | 1637 | WP_006278400.1 |
| 4 | Cylindrospermopsis_raciborskii_CS-505 | groEL | groEL2   | 1685 | WP_006278498.1 |
| 4 | Cylindrospermum_stagnale_PCC_7417     | groES | groES1   | 311  | WP_015205864.1 |
| 4 | Cylindrospermum_stagnale_PCC_7417     | groEL | groEL1   | 1640 | WP_015205865.1 |
| 4 | Cylindrospermum_stagnale_PCC_7417     | groES | groES1.2 | 311  | WP_015206484.1 |
| 4 | Cylindrospermum_stagnale_PCC_7417     | groEL | groEL1.2 | 1631 | WP_015206485.1 |
| 4 | Cylindrospermum_stagnale_PCC_7417     | groEL | groEL2   | 1727 | WP_015207554.1 |
| 4 | Microchaete_sp_PCC_7126               | groEL | groEL1   | 1634 | WP_017652696.1 |
| 4 | Microchaete_sp_PCC_7126               | groES | groES1   | 311  | WP_015130973.1 |
| 4 | Microchaete_sp_PCC_7126               | groEL | groEL2   | 1673 | WP_017652866.1 |
| 4 | Nodularia_spumigena_CCY9414           | groEL | groEL1   | 1637 | WP_006194607.1 |
| 4 | Nodularia_spumigena_CCY9414           | groES | groES1   | 311  | WP_006194609.1 |
| 4 | Nodularia_spumigena_CCY9414           | groEL | groEL2   | 1703 | WP_042202155.1 |
| 4 | Nostoc_azollae_0708                   | groEL | groEL1   | 1631 | WP_013191732.1 |
| 4 | Nostoc_azollae_0708                   | groES | groES1   | 311  | WP_013191733.1 |
| 4 | Nostoc_azollae_0708                   | groEL | groEL2   | 1730 | WP_041643235.1 |
| 4 | Nostoc_punctiforme_PCC_73102          | groEL | groEL1   | 1634 | WP_012407589.1 |
| 4 | Nostoc_punctiforme_PCC_73102          | groES | groES1   | 311  | WP_012407590.1 |

|   |                                   |       |                |      |                      |
|---|-----------------------------------|-------|----------------|------|----------------------|
| 4 | Nostoc_punctiforme_PCC_73102      | groEL | not determined | 1682 | WP_012407975.1       |
| 4 | Nostoc_punctiforme_PCC_73102      | groEL | not determined | 1637 | WP_012409490.1       |
| 4 | Nostoc_sp_PCC_7107                | groEL | groEL2         | 1664 | WP_015111848.1       |
| 4 | Nostoc_sp_PCC_7107                | groES | groES1         | 311  | WP_015113912.1       |
| 4 | Nostoc_sp_PCC_7107                | groEL | groEL1         | 1637 | WP_015113913.1       |
| 4 | Nostoc_sp_PCC_7120                | groEL | groEL2         | 1682 | WP_010996060.1       |
| 4 | Nostoc_sp_PCC_7120                | groES | groES1         | 311  | WP_010997805.1       |
| 4 | Nostoc_sp_PCC_7120                | groEL | groEL1         | 1634 | WP_010997806.1       |
| 4 | Nostoc_sp_PCC_7524                | groEL | groEL2         | 1697 | WP_041555042.1       |
| 4 | Nostoc_sp_PCC_7524                | groES | groES1         | 311  | WP_015139196.1       |
| 4 | Nostoc_sp_PCC_7524                | groEL | groEL1         | 1637 | WP_015139197.1       |
| 4 | Raphidiopsis_brookii_D9           | groES | groES1         | 311  | WP_009342971.1       |
| 4 | Raphidiopsis_brookii_D9           | groEL | groEL1         | 1637 | WP_009342972.1       |
| 4 | Raphidiopsis_brookii_D9           | groEL | groEL2         | 1685 | WP_009343442.1       |
| 4 | Rivularia_sp_PCC_7116             | groES | groES1         | 311  | WP_015116770.1       |
| 4 | Rivularia_sp_PCC_7116             | groEL | groEL1         | 1634 | WP_015116771.1       |
| 4 | Rivularia_sp_PCC_7116             | groEL | groEL2         | 1685 | WP_015119171.1       |
| 4 | Scytonema_PCC7110_joined          | groEL | groEL2         | 1673 | (GenBank) KYC41538.1 |
| 4 | Scytonema_PCC7110_joined          | groEL | groEL1         | 1640 | (GenBank) KYC39217.1 |
| 4 | Scytonema_PCC7110_joined          | groES | groES1         | 311  | (GenBank) KYC39218.1 |
| 4 | Scytonema_PCC7110_joined          | groES | groEL1.2       | 311  | (GenBank) KYC38917.1 |
| 4 | Scytonema_PCC7110_joined          | groEL | groEL1.2       | 1640 | (GenBank) KYC38918.1 |
| 4 | Tolypothrix_sp_PCC_9009           | groEL | groEL1         | 1637 | WP_029638606.1       |
| 4 | Tolypothrix_sp_PCC_9009           | groES | groES1         | 311  | WP_029638604.1       |
| 4 | Tolypothrix_sp_PCC_9009           | groEL | groEL2         | 1676 | WP_029634993.1       |
| 5 | Chlorogloeopsis_fritschii_PCC6912 | groEL | groEL2         | 1661 | WP_016873105.1       |
| 5 | Chlorogloeopsis_fritschii_PCC6912 | groES | groES1.2       | 329  | WP_016877281.1       |
| 5 | Chlorogloeopsis_fritschii_PCC6912 | groEL | groEL1.2       | 1637 | WP_016877280.1       |
| 5 | Chlorogloeopsis_fritschii_PCC6912 | groEL | groEL1         | 1640 | WP_016878546.1       |
| 5 | Chlorogloeopsis_fritschii_PCC6912 | groES | groES1         | 311  | WP_016878545.1       |
| 5 | Chlorogloopsis_PCC9212_joined     | groEL | groEL2         | 1661 | WP_016873105.1       |
| 5 | Chlorogloopsis_PCC9212_joined     | groEL | groES1.2       | 1637 | WP_016877280.1       |
| 5 | Chlorogloopsis_PCC9212_joined     | groES | groEL1.2       | 311  | WP_016877281.1       |
| 5 | Chlorogloopsis_PCC9212_joined     | groES | groES1         | 311  | WP_016878545.1       |
| 5 | Chlorogloopsis_PCC9212_joined     | groEL | groEL1         | 1640 | WP_016878546.1       |
| 5 | cyanobacterium_PCC_7702           | groEL | groEL2         | 1634 | WP_017321918.1       |
| 5 | cyanobacterium_PCC_7702           | groES | groES1.2       | 311  | WP_017321739.1       |
| 5 | cyanobacterium_PCC_7702           | groEL | groEL1.2       | 1637 | WP_017321738.1       |
| 5 | cyanobacterium_PCC_7702           | groES | groES1         | 311  | WP_017321483.1       |
| 5 | cyanobacterium_PCC_7702           | groEL | groEL1         | 1634 | WP_017321482.1       |
| 5 | cyanobacterium_PCC_7702           | groES | not determined | 311  | WP_017319771.1       |
| 5 | cyanobacterium_PCC_7702           | groEL | not determined | 1637 | WP_017319770.1       |
| 5 | Fischerella_sp_JSC-11             | groEL | groEL2         | 1652 | WP_009458011.1       |
| 5 | Fischerella_sp_JSC-11             | groES | groES1         | 311  | WP_009457502.1       |
| 5 | Fischerella_sp_JSC-11             | groEL | groEL1         | 1637 | WP_009457507.1       |
| 5 | Fischerella_sp_JSC-11             | groEL | groEL1.2       | 1634 | WP_009756747.1       |
| 5 | Fischerella_sp_JSC-11             | groES | groES1.2       | 311  | WP_009756748.1       |
| 5 | Fischerella_sp_PCC_9339           | groEL | groEL1         | 1637 | WP_017311910.1       |
| 5 | Fischerella_sp_PCC_9339           | groES | groES1         | 311  | WP_016863380.1       |
| 5 | Fischerella_sp_PCC_9339           | groEL | groEL2         | 1685 | WP_017311935.1       |
| 5 | Fischerella_sp_PCC_9431           | groEL | groEL2         | 1679 | WP_026722382.1       |
| 5 | Fischerella_sp_PCC_9431           | groES | groES1         | 311  | WP_016863380.1       |
| 5 | Fischerella_sp_PCC_9431           | groEL | groEL1         | 1637 | WP_026722402.1       |
| 5 | Fischerella_sp_PCC_9605           | groEL | groEL1         | 1637 | WP_026733542.1       |
| 5 | Fischerella_sp_PCC_9605           | groES | groES1         | 335  | WP_026733543.1       |
| 5 | Fischerella_sp_PCC_9605           | groEL | groEL2         | 1658 | WP_026733795.1       |
| 5 | Fischerella_sp_PCC_9605           | groEL | groEL1.2       | 1631 | WP_026735557.1       |
| 5 | Fischerella_sp_PCC_9605           | groES | groES1.2       | 311  | WP_026735558.1       |
| 5 | Fischerella_sp_PCC7521            | groEL | groEL2         | 1652 | WP_009458011.1       |
| 5 | Fischerella_sp_PCC7521            | groEL | groEL1         | 1637 | WP_009457507.1       |
| 5 | Fischerella_sp_PCC7521            | groES | groES1         | 311  | WP_009457502.1       |
| 5 | Fischerella_sp_PCC7521            | groES | groES1.2       | 311  | WP_009756748.1       |
| 5 | Fischerella_sp_PCC7521            | groEL | groEL1.2       | 1634 | WP_009756747.1       |
| 5 | FisPCC73103                       | groEL | groEL2         | 1673 | WP_016859319.1       |
| 5 | FisPCC73103                       | groEL | groEL1         | 1637 | WP_016863379.1       |
| 5 | FisPCC73103                       | groES | groES1         | 311  | WP_016863380.1       |
| 5 | FisPCC73103                       | groES | groES1.2       | 332  | WP_016863623.1       |
| 5 | FisPCC73103                       | groEL | groEL1.2       | 1637 | WP_016863624.1       |
| 5 | FisPCC7414                        | groEL | groEL2         | 1661 | WP_016865329.1       |
| 5 | FisPCC7414                        | groEL | groEL1.2       | 1634 | WP_016870295.1       |
| 5 | FisPCC7414                        | groES | groES1.2       | 311  | WP_009756748.1       |
| 5 | FisPCC7414                        | groEL | groEL1         | 1637 | WP_016867666.1       |
| 5 | FisPCC7414                        | groES | groES1         | 311  | WP_009457502.1       |
| 5 | Mastigocladopsis_repens_PCC_10914 | groES | groES1         | 335  | WP_017315948.1       |
| 5 | Mastigocladopsis_repens_PCC_10914 | groEL | groEL1         | 1640 | WP_017315949.1       |
| 5 | Mastigocladopsis_repens_PCC_10914 | groEL | groEL2         | 1664 | WP_017316382.1       |

**TableS2.** Location of CIRCE and K-Box elements upstream of *groEL* paralogs in Stigonematales. The coordinates relate to the open reading frame beginning. Nucleotide substitutions in conserved CIRCE and K-Box elements are highlighted in red. Lacking elements are marked with a dash.

| Organism                           | Position CIRCE | Position K-Box | CIRCE                       | K-Box                |
|------------------------------------|----------------|----------------|-----------------------------|----------------------|
| GroESL1                            |                |                |                             |                      |
| Chlorogloeopsis fritschii PCC 6912 | -17            | -83            | TTAGCACTCAGGAGTTGAGAGTGCTAA | GTTCCGG TAAC CCGTACC |
| Chlorogloeopsis sp. PCC 9212       | -18            | -84            | TTAGCACTCAGGAGTTGAGAGTGCTAA | GTTCCGG TAAC CCGTACA |
| Fischerella sp. PCC 73103          | -16            | -82            | TTAGCACTCAGGAGTTGAGAGTGCTAA | GTTCCGG GAAC CCGTACT |
| Fischerella sp. PCC 7414           | -16            | -82            | TTAGCACTCAGGAGTTGAGAGTGCTAA | GTTCCGG AACC CGTACG  |
| Fischerella sp. JSC-11             | -17            | -83            | TTAGCACTCAGGAGTTGAGAGTGCTAA | GTTCCGG GAAC CCGTACT |
| Fischerella thermalis PCC 7521     | -16            | -82            | TTAGCACTCAGGAGTTGAGAGTGCTAA | GTTCCGG GAAC CCGTACC |
| Fischerella sp. PCC 9339           | -15            | -81            | TTAGCACTCAGGAGTTGAGAGTGCTAA | GTTCCGG GAAC CCGTACC |
| Fischerella sp. PCC 9431           | -17            | -83            | TTAGCACTCAGGAGTTGAGAGTGCTAA | GTTCCGG GAAC CCGTACG |
| Fischerella sp. PCC 9605           | 0              | -59            | TTAGCACTCAGGAGTTGAGA        | GTTCCGG AAAC CCGTACC |
| Mastigocladopsis repens PCC 10914  | 0              | -60            | TTAGCACTCAGGAGTCGAGAG       | GTTCCGG GAAC CCGTACA |
| Cyanobacterium PCC 7702            | -18            | -84            | TTAGCACTCAGGAACAGAGAGTGCTAA | GTTCCGG GAAC CCGTACT |
| GroESL1.2                          |                |                |                             |                      |
| Chlorogloeopsis fritschii PCC 6912 | -156           | -221           | TTAGCAATCGAAAGGTGAGAGTGCTAA | GTTCCGGAAACCNACA     |
| Chlorogloeopsis sp. PCC 9212       | -44            | -109           | TTAGCAATCGAAAGGCGAGAGTGTTAA | GTTCCGGAAACCGCAC     |
| Fischerella sp. PCC 73103          | -              | -              | -                           | -                    |
| Fischerella sp. PCC 7414           | -188           | -296           | TTAGAGTAGAACATTCAAATCTGTGGA | GTTCCGGAAACCCCAA     |
| Fischerella sp. JSC-11             | -189           | -296           | TTAGAGTAGAACATTCAAATCTGTGGA | GTTCCGGAAACCCCAA     |
| Fischerella thermalis PCC 7521     | -              | -295           | -                           | GTTCCGGAAACCCAAA     |
| Fischerella sp. PCC 9605           | -135           | -200           | TTAGCAATCGAAATAAGAGAGTGCTAA | GTTCCGGAAACCNACA     |
| Cyanobacterium PCC 7702            | -44            | -109           | TTAGCAATCGAAAGGCGAGAGTGTTAA | GTTCCGGAAACCGCAC     |
| GroEL2                             |                |                |                             |                      |
| Chlorogloeopsis fritschii PCC 6912 | -34            | -              | TTAGCACTCTTGTCTGTGAGTGCTAA  | -                    |
| Chlorogloeopsis sp. PCC 9212       | -34            | -              | TTAGCACTCTTGTCTGTGAGTGCTAA  | -                    |
| Fischerella sp. PCC 73103          | -44            | -              | TTAGCACTCTTGCCTTGTGAGTGCTAA | -                    |
| Fischerella sp. PCC 7414           | -44            | -              | TTAGCACTCTTGCCTTGTGAGTGCTAA | -                    |
| Fischerella sp. JSC-11             | -44            | -              | TTAGCACTCTTGGCTTGTGAGTGCTAA | -                    |
| Fischerella thermalis PCC 7521     | -45            | -              | TTAGCACTCTTGGCTTGTGAGTGCTAA | -                    |
| Fischerella sp. PCC 9339           | -44            | -              | TTAGCACTCTTGCCTTGTGAGTGCTAA | -                    |
| Fischerella sp. PCC 9431           | -45            | -              | TTAGCACTCTTGTCTAGTGAGTGCTAA | -                    |
| Fischerella sp. PCC 9605           | -43            | -              | TTAGCACTCTTGTCTGTGAGTGCTAA  | -                    |
| Mastigocladopsis repens PCC 10914  | -34            | -              | TTAGCACTCTTGACCGCTGAGTGCTAA | -                    |
| Cyanobacterium PCC 7702            | -35            | -              | TTAGCACTCTTGTCTGTGAGTGCTAA  | -                    |

**TableS3.** List of forward and reverse primers used for amplification and corresponding assays.

| Sequence    | Sequence of forward primer          | Sequence of reverse primer             | Assay           |
|-------------|-------------------------------------|----------------------------------------|-----------------|
| groES1      | CTGCAGCATGGCAGCTGTATCTCTAAG         | GGATCCGGGCTAACGATCGCCAAAAT             | BACTH           |
| groES1      | CTGCAGCCATGGCAGCTGTATCTCTAA         | GGATCCGCTAACGATCGCCAAAATGTC            | BACTH           |
| groEL1      | CTGCAGCATGGCAAAGCGCATTATTTACA       | GGATCCGGGTAATCGAAGTCGCCGCC             | BACTH           |
| groEL1      | CTGCAGCCATGGCAAAGCGCATTATTTAC       | GGATCCGTAATCGAAGTCGCCGCC               | BACTH           |
| groES1.2    | CTGCAGCCATGCTTGGAGGATTAGATATG       | GGATCCTGTCAGTGTGCAAGGATG               | BACTH           |
| groEL1.2    | CTGCAGCATGGCTAAACAAATAATTTATAACG    | GGATCCGGGTAATCAAAATCGCCACCCA           | BACTH           |
| groEL1.2    | CTGCAGCCATGGCTAAACAAATAATTTATAACG   | GGATCCGTAATCAAAATCGCCACCCA             | BACTH           |
| groEL2      | CTGCAGCATGGCAAATAATTGCTTTGACGAAG    | GGATCCGGCATCATACCCATGCCGCC             | BACTH           |
| groEL2      | CTGCAGCCATGGCAAATAATTGCTTTGACGAAG   | GGATCCCATCATACCCATGCCGCC               | BACTH           |
| groEL2      | CTGCAGCCATGGCAAATAATTGCTTTGACGAAG   | GGATCCCATCATACCCATGCCGCC               | BACTH           |
| groEL1      | CTGCTGGGTCTCCCATAGCTGATGGCTAATAG    | GCCCGTGGTCTCAGCGCTTTAGTAATCGAAGTCGCCGC | Complementation |
| groEL1.2    | CTGCTGGGTCTCCTAATGTAGGAGTTAGGGGCTAG | CTGCTGGGTCTCAGCGCTTTAGTAATCAAAATCGCCAC | Complementation |
| groEL2      | CTGGAGGGTCTCCTAATGCTGTATCCAACATCAGC | CAGCAGGGTCTCAGCGCTCTACATCATACCCATGCCGC | Complementation |
| groES1      | GGTCTCTATGGCAGCTGTATCTCTAAGCG       | GGTCTCAGCGCTTAGCTAACGATCGCCAAAATGT     | Complementation |
| groES1.2    | GGTCTCTATGCTTGGAGGATTAGATATGGCG     | GGTCTCAGCGCTATGTCAGTGTGCAAGGATG        | Complementation |
| pASK-IBA3sp | GCCTCACTGATTAAGCATTGGTAGG           | CAGGGTATTGCTCATGAGCGG                  | Complementation |
| rnpB        | ACCAAACCTTGCTGGGTAACG               | CACCTTGCACCCCTACCTT                    | RT qPCR         |
| glnA        | CTGCAAGATATGCGGACAGA                | AAGCCCAATTCACACTGACC                   | RT qPCR         |
| groEL1      | CGATTCTGCTCAAGCGTGGTA               | CCAGCAGAGATGGCACCT                     | RT qPCR         |
| groEL1.2    | TGTTGCCCGTGCCCTTTA                  | ATCAAATGGTTTTCTTCACTCG                 | RT qPCR         |
| groEL2      | ATTGGCAAATTCGCAAGCAAC               | TCCGCAATTTGCGGTCTTTAAG                 | RT qPCR         |
| groES1.2    | AGGTGAATCAGAGGAGAAGAC               | GGCGTGAAGCGTCTTCATT                    | RT qPCR         |
| pGroEL1     | AGTAGAATTCGCTCTGAAGTTTCTATACAATTAC  | AGTACTGCAGACAAATTCGTGCCTTGTTAG         | GFP-Fusions     |
| pGroEL1.2   | AGTAGAATTCGCTCTGAAGTTTCTACACTCTT    | AGTACTGCAGTATTTATTGAATTTACAACCTCGTACTA | GFP-Fusions     |
| pGroEL2     | AGTAGAATTCCTTGGCGCTTCCATCAT         | AGTACTGCAGCGCTTCCATCATTAC              | GFP-Fusions     |

**TableS4.** Transcriptional regulation of *groEL* and *groES* paralogs in *C. fritschii* PCC 6912.

high temperature condition

| Duration            | Biological replicate | Ct (target gene) | Ct (endogen control) | $\Delta$ ct | $\Delta\Delta$ ct | fold change |
|---------------------|----------------------|------------------|----------------------|-------------|-------------------|-------------|
| <b>groEL1</b> mpB   |                      |                  |                      |             |                   |             |
| t(0)= calibrato     | 1                    | 20,93            | 14,10                | 6,83        | 0,00              | 1,00        |
| t(0)= calibrato     | 2                    | 19,13            | 14,00                | 5,12        | 0,00              | 1,00        |
| t(0)= calibrato     | 3                    | 22,86            | 14,65                | 8,22        | 0,00              | 1,00        |
| 5 min               | 1                    | 19,54            | 14,82                | 4,72        | -2,11             | 4,31        |
| 5 min               | 2                    | 16,28            | 13,92                | 2,36        | -2,76             | 6,79        |
| 5 min               | 3                    | 20,84            | 14,80                | 6,04        | -2,18             | 4,52        |
| 15 min              | 1                    | 18,57            | 13,69                | 4,87        | -1,95             | 3,88        |
| 15 min              | 2                    | 15,96            | 14,03                | 1,93        | -3,20             | 9,18        |
| 15 min              | 3                    | 19,72            | 15,09                | 4,63        | -3,58             | 11,99       |
| 30 min              | 1                    | 14,33            | 14,00                | 0,33        | -6,50             | 90,73       |
| 30 min              | 2                    | 13,43            | 14,17                | -0,74       | -5,86             | 58,28       |
| 30 min              | 3                    | 16,57            | 14,75                | 1,81        | -6,40             | 84,64       |
| <b>groEL1.2</b> mpB |                      |                  |                      |             |                   |             |
| t(0)= calibrato     | 1                    | 31,87            | 14,10                | 17,78       | 0,00              | 1,00        |
| t(0)= calibrato     | 2                    | 30,26            | 14,00                | 16,26       | 0,00              | 1,00        |
| t(0)= calibrato     | 3                    | 30,99            | 14,65                | 16,34       | 0,00              | 1,00        |
| 5 min               | 1                    | 27,95            | 14,82                | 13,13       | -4,65             | 25,05       |
| 5 min               | 2                    | 25,33            | 13,92                | 11,41       | -4,85             | 28,87       |
| 5 min               | 3                    | 26,11            | 14,80                | 11,32       | -5,02             | 32,56       |
| 15 min              | 1                    | 25,39            | 13,69                | 11,70       | -6,08             | 67,48       |
| 15 min              | 2                    | 21,89            | 14,03                | 7,86        | -8,40             | 336,68      |
| 15 min              | 3                    | 24,07            | 15,09                | 8,98        | -7,36             | 164,07      |
| 30 min              | 1                    | 20,06            | 14,00                | 6,06        | -11,71            | 3361,11     |
| 30 min              | 2                    | 19,24            | 14,17                | 5,06        | -11,19            | 2343,59     |
| 30 min              | 3                    | 21,38            | 14,75                | 6,63        | -9,71             | 836,89      |
| <b>groEL2</b> mpB   |                      |                  |                      |             |                   |             |
| t(0)= calibrato     | 1                    | 24,15            | 14,10                | 10,05       | 0,00              | 1,00        |
| t(0)= calibrato     | 2                    | 23,97            | 14,00                | 9,97        | 0,00              | 1,00        |
| t(0)= calibrato     | 3                    | 26,32            | 14,65                | 11,67       | 0,00              | 1,00        |
| 5 min               | 1                    | 21,62            | 14,82                | 6,79        | -3,25             | 9,53        |
| 5 min               | 2                    | 19,40            | 13,92                | 5,48        | -4,48             | 22,39       |
| 5 min               | 3                    | 22,36            | 14,80                | 7,57        | -4,10             | 17,15       |
| 15 min              | 1                    | 20,99            | 13,69                | 7,30        | -2,75             | 6,73        |
| 15 min              | 2                    | 20,06            | 14,03                | 6,03        | -3,94             | 15,34       |
| 15 min              | 3                    | 21,40            | 15,09                | 6,31        | -5,36             | 41,05       |
| 30 min              | 1                    | 19,17            | 14,00                | 5,17        | -4,88             | 29,47       |
| 30 min              | 2                    | 19,15            | 14,17                | 4,98        | -4,99             | 31,76       |
| 30 min              | 3                    | 20,80            | 14,75                | 6,04        | -5,63             | 49,44       |

| Summary  |             |      |        |         |         |
|----------|-------------|------|--------|---------|---------|
| groEL1   | time        | 0    | 5 min  | 15 min  | 30 min  |
|          | fold change | 1,00 | 4,31   | 3,88    | 90,73   |
|          |             | 1,00 | 6,79   | 9,18    | 58,28   |
|          |             | 1,00 | 4,52   | 11,99   | 84,64   |
|          | mean        | 1,00 | 5,20   | 8,35    | 77,88   |
| SD       | 0,00        | 1,38 | 4,12   | 17,25   |         |
| groEL1.2 | time        | 0    | 5 min  | 15 min  | 30 min  |
|          | fold change | 1,00 | 25,05  | 67,48   | 3361,11 |
|          |             | 1,00 | 28,87  | 336,68  | 2343,59 |
|          |             | 1,00 | 32,56  | 164,07  | 836,89  |
|          | mean        | 1,00 | 28,82  | 189,41  | 2180,53 |
| SD       | 0,00        | 3,75 | 136,38 | 1269,98 |         |
| groEL2   | time        | 0    | 5 min  | 15 min  | 30 min  |
|          | fold change | 1,00 | 9,53   | 6,73    | 29,47   |
|          |             | 1,00 | 22,39  | 15,34   | 31,76   |
|          |             | 1,00 | 17,15  | 41,05   | 49,44   |
|          | mean        | 1,00 | 16,36  | 21,04   | 36,89   |
| SD       | 0,00        | 6,46 | 17,86  | 10,93   |         |

high light condition

| Duration            | Biological replicate | Ct (target gene) | Ct (endogen control) | $\Delta$ ct | $\Delta\Delta$ ct | fold change |
|---------------------|----------------------|------------------|----------------------|-------------|-------------------|-------------|
| <b>groEL1</b> mpB   |                      |                  |                      |             |                   |             |
| t(0)= calibrato     | 1                    | 19,06            | 13,18                | 5,88        | 0,00              | 1,00        |
| t(0)= calibrato     | 2                    | 16,96            | 12,55                | 4,41        | 0,00              | 1,00        |
| t(0)= calibrato     | 3                    | 15,99            | 13,05                | 2,94        | 0,00              | 1,00        |
| 5 min               | 1                    | 17,81            | 12,51                | 5,30        | -0,58             | 1,49        |
| 5 min               | 2                    | 17,40            | 12,93                | 4,47        | 0,05              | 0,96        |
| 5 min               | 3                    | 16,34            | 12,59                | 3,75        | 0,81              | 0,57        |
| 15 min              | 1                    | 18,02            | 12,93                | 5,09        | 0,68              | 1,73        |
| 15 min              | 2                    | 17,18            | 13,28                | 3,90        | -1,98             | 1,43        |
| 15 min              | 3                    | 16,22            | 12,46                | 3,76        | 0,82              | 0,57        |
| 30 min              | 1                    | 16,87            | 13,06                | 3,81        | -2,07             | 4,21        |
| 30 min              | 2                    | 17,12            | 12,67                | 4,44        | 0,03              | 0,98        |
| 30 min              | 3                    | 15,93            | 12,93                | 3,00        | 0,06              | 0,96        |
| <b>groEL1.2</b> mpB |                      |                  |                      |             |                   |             |
| t(0)= calibrato     | 1                    | 29,46            | 13,18                | 16,28       | 0,00              | 1,00        |
| t(0)= calibrato     | 2                    | 30,27            | 12,55                | 17,73       | 0,00              | 1,00        |
| t(0)= calibrato     | 3                    | 28,83            | 13,05                | 15,77       | 0,00              | 1,00        |
| 5 min               | 1                    | 28,25            | 12,51                | 15,74       | -0,54             | 1,45        |
| 5 min               | 2                    | 28,97            | 12,93                | 16,04       | -1,69             | 3,22        |
| 5 min               | 3                    | 27,11            | 12,59                | 14,52       | -1,25             | 2,38        |
| 15 min              | 1                    | 28,01            | 12,93                | 15,09       | -2,64             | 2,29        |
| 15 min              | 2                    | 27,70            | 13,28                | 14,42       | -1,86             | 9,92        |
| 15 min              | 3                    | 27,69            | 12,46                | 15,23       | -0,55             | 1,46        |
| 30 min              | 1                    | 26,27            | 13,06                | 13,21       | -3,07             | 8,39        |
| 30 min              | 2                    | 27,32            | 12,67                | 14,65       | -3,08             | 8,47        |
| 30 min              | 3                    | 26,25            | 12,93                | 13,33       | -2,45             | 5,45        |
| <b>groEL2</b> mpB   |                      |                  |                      |             |                   |             |
| t(0)= calibrato     | 1                    | 23,79            | 13,18                | 10,61       | 0,00              | 1,00        |
| t(0)= calibrato     | 2                    | 23,41            | 12,55                | 10,86       | 0,00              | 1,00        |
| t(0)= calibrato     | 3                    | 22,49            | 13,05                | 9,44        | 0,00              | 1,00        |
| 5 min               | 1                    | 20,17            | 12,51                | 7,67        | -2,94             | 7,68        |
| 5 min               | 2                    | 20,52            | 12,93                | 7,58        | -3,28             | 9,71        |
| 5 min               | 3                    | 19,13            | 12,59                | 6,54        | -2,90             | 7,46        |
| 15 min              | 1                    | 20,57            | 12,93                | 7,65        | -2,96             | 7,79        |
| 15 min              | 2                    | 19,84            | 13,28                | 6,56        | -4,30             | 19,69       |
| 15 min              | 3                    | 19,79            | 12,46                | 7,33        | -2,11             | 4,32        |
| 30 min              | 1                    | 19,54            | 13,06                | 6,48        | -4,13             | 17,49       |
| 30 min              | 2                    | 20,23            | 12,67                | 7,56        | -3,30             | 9,83        |
| 30 min              | 3                    | 19,28            | 12,93                | 6,35        | -3,08             | 8,48        |

| Summary  |             |      |       |        |        |
|----------|-------------|------|-------|--------|--------|
| groEL1   | time        | 0    | 5 min | 15 min | 30 min |
|          | fold change | 1,00 | 1,49  | 1,73   | 4,21   |
|          |             | 1,00 | 0,96  | 1,43   | 0,98   |
|          |             | 1,00 | 0,57  | 0,57   | 0,96   |
|          | mean        | 1,00 | 1,01  | 1,24   | 2,05   |
| SD       | 0,00        | 0,46 | 0,60  | 1,87   |        |
| groEL1.2 | time        | 0    | 5 min | 15 min | 30 min |
|          | fold change | 1,00 | 1,45  | 2,29   | 8,39   |
|          |             | 1,00 | 3,22  | 9,92   | 8,47   |
|          |             | 1,00 | 2,38  | 1,46   | 5,45   |
|          | mean        | 1,00 | 2,35  | 4,55   | 7,43   |
| SD       | 0,00        | 0,88 | 4,66  | 1,72   |        |
| groEL2   | time        | 0    | 5 min | 15 min | 30 min |
|          | fold change | 1,00 | 7,68  | 7,79   | 17,49  |
|          |             | 1,00 | 9,71  | 19,69  | 9,83   |
|          |             | 1,00 | 7,46  | 4,32   | 8,48   |
|          | mean        | 1,00 | 8,28  | 10,60  | 11,94  |
| SD       | 0,00        | 1,24 | 8,06  | 4,86   |        |

diazotrophic condition (nitrogen deprivation)

| Duration            | Biological replicate | Ct (target gene) | Ct (endogen control) | Δct   | ΔΔct  | fold change |
|---------------------|----------------------|------------------|----------------------|-------|-------|-------------|
| <b>groEL1</b> mpB   |                      |                  |                      |       |       |             |
| t(0)= calibrato     | 1                    | 20,06            | 14,00                | 6,05  | 0,00  | 1,00        |
| t(0)= calibrato     | 2                    | 21,95            | 14,90                | 7,06  | 0,00  | 1,00        |
| t(0)= calibrato     | 3                    | 20,03            | 15,17                | 4,86  | 0,00  | 1,00        |
| 3 h                 | 1                    | 17,02            | 15,90                | 1,12  | -4,93 | 30,56       |
| 3 h                 | 2                    | 23,43            | 20,58                | 2,85  | -4,20 | 18,40       |
| 3 h                 | 3                    | 17,77            | 17,77                | 0,00  | -4,86 | 28,96       |
| 8 h                 | 1                    | 19,12            | 15,87                | 3,24  | -2,81 | 7,02        |
| 8 h                 | 2                    | 20,56            | 16,68                | 3,88  | -3,17 | 9,02        |
| 8 h                 | 3                    | 21,53            | 17,28                | 4,25  | -0,61 | 1,52        |
| 24 h                | 1                    | 22,11            | 19,23                | 2,88  | -3,17 | 9,02        |
| 24 h                | 2                    | 20,73            | 15,94                | 4,79  | -2,27 | 4,82        |
| 24 h                | 3                    | 19,93            | 18,09                | 1,84  | -3,02 | 8,11        |
| <b>groEL1.2</b> mpB |                      |                  |                      |       |       |             |
| t(0)= calibrato     | 1                    | 29,10            | 14,00                | 15,09 | 0,00  | 1,00        |
| t(0)= calibrato     | 2                    | 29,93            | 14,90                | 15,03 | 0,00  | 1,00        |
| t(0)= calibrato     | 3                    | 29,46            | 15,17                | 14,29 | 0,00  | 1,00        |
| 3 h                 | 1                    | 27,42            | 15,90                | 11,52 | -3,58 | 11,92       |
| 3 h                 | 2                    | 31,37            | 20,58                | 10,79 | -4,24 | 18,93       |
| 3 h                 | 3                    | 27,60            | 17,77                | 9,82  | -4,46 | 22,05       |
| 8 h                 | 1                    | 25,87            | 15,87                | 9,99  | -5,10 | 34,33       |
| 8 h                 | 2                    | 24,98            | 15,27                | 9,70  | -5,33 | 40,13       |
| 8 h                 | 3                    | 27,16            | 17,28                | 9,88  | -4,40 | 21,15       |
| 24 h                | 1                    | 28,96            | 19,23                | 9,73  | -5,37 | 41,25       |
| 24 h                | 2                    | 26,92            | 18,09                | 8,84  | -6,19 | 73,04       |
| 24 h                | 3                    | 27,59            | 18,09                | 9,50  | -4,79 | 27,66       |
| <b>groEL2</b> mpB   |                      |                  |                      |       |       |             |
| t(0)= calibrato     | 1                    | 24,76            | 14,00                | 10,75 | 0,00  | 1,00        |
| t(0)= calibrato     | 2                    | 25,88            | 14,90                | 10,99 | 0,00  | 1,00        |
| t(0)= calibrato     | 3                    | 24,47            | 15,17                | 9,29  | 0,00  | 1,00        |
| 3 h                 | 1                    | 23,97            | 15,90                | 8,07  | -2,68 | 6,43        |
| 3 h                 | 2                    | 28,76            | 20,58                | 8,18  | -2,80 | 6,98        |
| 3 h                 | 3                    | 24,30            | 17,77                | 6,53  | -2,76 | 6,78        |
| 8 h                 | 1                    | 25,35            | 15,87                | 9,48  | -1,28 | 2,42        |
| 8 h                 | 2                    | 25,27            | 15,27                | 9,99  | -0,99 | 1,99        |
| 8 h                 | 3                    | 28,14            | 17,28                | 10,86 | 1,57  | 0,34        |
| 24 h                | 1                    | 27,90            | 19,23                | 8,67  | -2,08 | 4,23        |
| 24 h                | 2                    | 27,31            | 18,09                | 9,23  | -1,76 | 3,39        |
| 24 h                | 3                    | 27,18            | 18,09                | 9,08  | -0,21 | 1,16        |
| <b>glnA</b> mpB     |                      |                  |                      |       |       |             |
| t(0)= calibrato     | 1                    | 19,10            | 15,19                | 3,91  | 0,00  | 1,00        |
| t(0)= calibrato     | 2                    | 20,99            | 12,77                | 8,21  | 0,00  | 1,00        |
| t(0)= calibrato     | 3                    | 22,78            | 16,40                | 6,39  | 0,00  | 1,00        |
| 3 h                 | 1                    | 15,65            | 15,20                | 0,45  | -3,46 | 11,02       |
| 3 h                 | 2                    | 24,16            | 19,46                | 4,70  | -3,52 | 11,43       |
| 3 h                 | 3                    | 16,22            | 12,73                | 3,49  | -2,90 | 7,46        |
| 8 h                 | 1                    | 18,29            | 13,66                | 4,63  | 0,72  | 0,61        |
| 8 h                 | 2                    | 20,03            | 13,23                | 6,80  | -1,42 | 2,67        |
| 8 h                 | 3                    | 19,92            | 11,95                | 7,97  | 1,59  | 0,33        |
| 24 h                | 1                    | 19,48            | 14,38                | 5,10  | 1,19  | 0,44        |
| 24 h                | 2                    | 19,65            | 12,79                | 6,86  | -1,35 | 2,55        |
| 24 h                | 3                    | 18,56            | 12,56                | 6,00  | -0,39 | 1,31        |

| Summary  |             |      |       |       |       |
|----------|-------------|------|-------|-------|-------|
|          | time        | 0    | 3 h   | 8 h   | 24 h  |
| groEL1   | fold change | 1,00 | 30,56 | 7,02  | 9,02  |
|          |             | 1,00 | 18,40 | 9,02  | 4,82  |
|          |             | 1,00 | 28,96 | 1,52  | 8,11  |
|          | mean        | 1,00 | 25,97 | 5,86  | 7,32  |
|          | SD          | 0,00 | 6,61  | 3,88  | 2,21  |
| groEL1.2 | fold change | 1,00 | 11,92 | 34,33 | 41,25 |
|          |             | 1,00 | 18,93 | 40,13 | 73,04 |
|          |             | 1,00 | 22,05 | 21,15 | 27,66 |
|          | mean        | 1,00 | 17,63 | 31,87 | 47,32 |
|          | SD          | 0,00 | 5,19  | 9,73  | 23,29 |
| groEL2   | fold change | 1,00 | 6,43  | 2,42  | 4,23  |
|          |             | 1,00 | 6,98  | 1,99  | 3,39  |
|          |             | 1,00 | 6,78  | 0,34  | 1,16  |
|          | mean        | 1,00 | 6,73  | 1,58  | 2,93  |
|          | SD          | 0,00 | 0,28  | 1,10  | 1,59  |
| glnA     | fold change | 1,00 | 11,02 | 0,61  | 0,44  |
|          |             | 1,00 | 11,43 | 2,67  | 2,55  |
|          |             | 1,00 | 7,46  | 0,33  | 1,31  |
|          | mean        | 1,00 | 9,97  | 1,21  | 1,43  |
|          | SD          | 0,00 | 2,19  | 1,28  | 1,06  |

| Curve parameters (y=mx+b) |          |          |          |
|---------------------------|----------|----------|----------|
|                           | groEL1   | groEL1.2 | groEL2   |
| amplicon leng             | 121      | 100      | 151      |
| MW(amplicon)              | 37361,25 | 30991,09 | 46924,53 |
| m = slope                 | -3,39    | -3,39    | -3,45    |
| b = intercept(t)          | 6,99     | 7,10     | 8,10     |
| R <sup>2</sup>            | 1,00     | 1,00     | 1,00     |
| primer efficien           | 1,97     | 1,97     | 1,95     |

MW=Molecular weight  
R<sup>2</sup>=coefficient of determination  
x=ng cDNA

|          | Biological replicate | Ct    | log   | pg cDNA  | molecules/ μl | copies in 20μl | copy number/ ng RNA |
|----------|----------------------|-------|-------|----------|---------------|----------------|---------------------|
| groEL1   | 1                    | 20,06 | -3,85 | 1,40E-04 | 4,21E+10      | 8,41E+11       | 1,68E+10            |
|          | 2                    | 18,22 | -3,31 | 4,89E-04 | 7,88E+06      | 1,58E+08       | 3,15E+06            |
|          | 3                    | 20,22 | -3,90 | 1,26E-04 | 2,03E+06      | 4,05E+07       | 8,10E+05            |
|          | 4                    | 19,06 | -3,56 | 2,76E-04 | 4,45E+06      | 8,90E+07       | 1,78E+06            |
|          | 5                    | 20,93 | -4,11 | 7,78E-05 | 1,25E+06      | 2,51E+07       | 5,01E+05            |
|          | 6                    | 19,13 | -3,58 | 2,64E-04 | 4,26E+06      | 8,52E+07       | 1,70E+06            |
| groEL1.2 | 1                    | 29,46 | -6,63 | 2,37E-07 | 3,82E+03      | 7,64E+04       | 2,00E+03            |
|          | 2                    | 28,83 | -6,44 | 3,64E-07 | 5,87E+03      | 1,17E+05       | 3,07E+03            |
|          | 3                    | 29,46 | -6,63 | 2,37E-07 | 3,82E+03      | 7,63E+04       | 2,00E+03            |
|          | 4                    | 29,10 | -6,52 | 3,03E-07 | 4,88E+03      | 9,77E+04       | 2,55E+03            |
|          | 5                    | 29,93 | -6,76 | 1,73E-07 | 2,78E+03      | 5,57E+04       | 1,46E+03            |
|          | 6                    | 29,42 | -6,61 | 2,43E-07 | 3,91E+03      | 7,83E+04       | 2,05E+03            |
| groEL2   | 1                    | 24,15 | -5,06 | 8,75E-06 | 1,41E+05      | 2,82E+06       | 1,14E+05            |
|          | 2                    | 23,41 | -4,84 | 1,44E-05 | 2,33E+05      | 4,66E+06       | 1,87E+05            |
|          | 3                    | 24,47 | -5,15 | 7,03E-06 | 1,13E+05      | 2,27E+06       | 9,19E+04            |
|          | 4                    | 23,79 | -4,95 | 1,12E-05 | 1,80E+05      | 3,60E+06       | 1,45E+05            |
|          | 5                    | 24,76 | -5,24 | 5,78E-06 | 9,32E+04      | 1,86E+06       | 7,59E+04            |
|          | 6                    | 23,97 | -5,01 | 9,86E-06 | 1,59E+05      | 3,18E+06       | 1,28E+05            |

Transcription level groESL

| Biological replicate | Ct (target gene) | Ct (endogen control) | Δct        | Ratio groEL:groES |
|----------------------|------------------|----------------------|------------|-------------------|
| groEL1.2 mpB         |                  |                      |            |                   |
| 1                    | 27,50953851      | 15,4515928           | 12,0579457 |                   |
| 2                    | 28,1796575       | 15,9387998           | 12,2408577 |                   |
| 3                    | 27,6302689       | 15,4038369           | 12,226432  |                   |



|   | groES1.2   | mpB        |            |            |  |
|---|------------|------------|------------|------------|--|
| 1 | 24,5800028 | 15,4515928 | 9,12841003 | 1,32092508 |  |
| 2 | 25,6518929 | 15,9387998 | 9,71309315 | 1,26024301 |  |
| 3 | 25,5089216 | 15,4038369 | 10,1050847 | 1,2099287  |  |
